# Supplementary material
Source: PubMed Central journal article supplement (PMC4637992)
Supplement: NIHMS65430-supplement-01.pdf [file NIHMS65430-supplement-01.pdf]

## SUPPLEMENTAL FIGURE LEGENDS

**Supplemental Figure S1.** ChIP Analysis for the GL2 Binding to the *LRL1* and *LRL3* Upstream Regions.

**(A)** The regions amplified in the ChIP analysis, *LRL1*-S1, *LRL1*-N, *LRL1*-S2 and *LRL3*-N, are schematically illustrated. The L1 box-like sequence exists in *LRL1*-S1 and *LRL1*-S2, but not in *LRL1*-N or *LRL3*-N.

**(B)** Results of the ChIP analysis of the regions illustrated in **(A)** are shown. Relative enrichment folds (anti-GFP/IgG) in *GL2pro-GFP-GL2/gl2-5* roots and wild-type roots are shown in white and gray boxes, respectively (mean  $\pm$  s.d.,  $n = 3$ ). Asterisks indicate significant differences between the enrichment folds in *GL2-pro-GFP-GL2/gl2-5* and in the wild type (\*  $P < 0.05$ ; \*\*  $P < 0.01$ , Student's *t*-test).

**Supplemental Figure S2.** Expression Analysis of the *lrl1-2* and *lrl2-2* Mutant Genes.

**(A)** The gene structures and T-DNA insertion sites of *lrl1-2* (SALK\_006430) and *lrl2-2* (SALK\_029317c) are schematically illustrated. Horizontal arrows labeled with F and R indicate the locations of the PCR primers used in **(B)**.

**(B)** The results of semi-quantitative RT-PCR analysis for *LRL1* and *LRL2* transcripts in wild-type and mutant plants are shown. Transcripts of the *TUBULIN2* (*TUB2*) gene were used as reference.

**Supplemental Figure S3.** Expression Patterns and Intensities of bHLH-GFP Fusion Proteins Driven by the *GL2* Promoter.

The GFP fluorescence signals in transgenic roots harboring *GL2pro-RHD6-GFP* **(A)**, *GL2pro-RSL1-GFP* **(B)**, *GL2pro-RSL2-GFP* **(C)**, *GL2pro-LRL1-GFP* **(D)**, and

*GL2pro-LRL2-GFP* (E) are shown. Bar = 100  $\mu$ m

**Supplemental Figure S4.** Root Hair Development Patterns of the Transgenic Plants Harboring the *GL2* Promoter-driven bHLH-GFP Genes.

PI-stained epidermal cells of wild-type (A) and *gl2-5* (B) roots, and transgenic roots harboring *GL2pro-RHD6-GFP* (C), *GL2pro-RSL1-GFP* (D), *GL2pro-RSL2-GFP* (E), *GL2pro-LRL1-GFP* (F), *GL2pro-LRL2-GFP* (G), *GL2pro-VP16-GL2 $\Delta$ N* (H), and *GL2pro-LRL1-GFP* and *GL2pro-RHD6-GFP* (I) are shown. N and H cell files, the identities of which were judged by the fact that cells in N cell files are longer than those in H cell files, are marked by “N” and “H”, respectively. Arrowheads and Arrows indicate ectopic root hairs developing from N cell files and branching root hairs, respectively. Bar = 25  $\mu$ m

**Supplemental Figure S5.** Trichome Phenotypes of Transgenic Plants Harboring Both *GL2pro-LRL1-GFP* and *GL2pro-RHD6-GFP*.

Trichomes of wild-type plants (A) and transgenic plants harboring both *GL2pro-LRL1-GFP* and *GL2pro-RHD6-GFP* (B to D) are shown. Bar = 250  $\mu$ m

**Supplemental Figure S6.** Sequences Surrounding the L1 Box-like Sites Recognized by GL2.

DNA sequences surrounding the L1 box-like sites that have confirmed to be bound to GL2 individually by ChIP analysis are aligned. The sites *CESA5-S*, *MYB23-S*, *PAP2-S*, and *MYB113-S* correspond to the L1 box-like sites 802-, 2,372-, 1755-, and 837-base upstream from their initiation codons, respectively. The other sites are the same as those shown in Table II. The sites, *RSL2-S3-1*, *RSL2-S3-2*, *LRL1-S1-1*,

*LRL1-S1-2*, and those in the *TT8* promoter region are omitted because they were examined for GL2 binding to more than one copy of the L1 box like-sequence. The L1 box-like sequence is highlighted. Frequently appearing bases (at 50% or higher) at each position are shadowed. The sequence composed of the frequently appearing bases is shown below the alignment.

864 genes the steady-state transcript levels of which were consistently up-regulated by the dexamethasone (DEX) treatment of the 35pro-VPI6GLZLN seedlings more than 2-fold in triplicated microarray experiments are listed.

| Gene ID   | average fold-change | DEX-A vs DMSO-A<br>Signal fold-change | DEX-A vs DMSO-A<br>Change p-value | DEX-B vs DMSO-B<br>Signal fold-change | DEX-B vs DMSO-B<br>Change p-value | DEX-C vs DMSO-C<br>Signal fold-change | DEX-C vs DMSO-C<br>Change p-value | DEX-D vs DMSO-D<br>Signal fold-change | DEX-D vs DMSO-D<br>Change p-value | Annotation                                                                                                                                                          |
|-----------|---------------------|---------------------------------------|-----------------------------------|---------------------------------------|-----------------------------------|---------------------------------------|-----------------------------------|---------------------------------------|-----------------------------------|---------------------------------------------------------------------------------------------------------------------------------------------------------------------|
| 260124.at | 977.76              | 382.04                                | 0.00002                           | 2194.99                               | 0.00002                           | 1176.27                               | 0.00002                           | 1176.27                               | 0.00002                           | UBC31 (UBQUITIN-CONJUGATING ENZYME 31); ubiquitin-protein ligase                                                                                                    |
| 260223.at | 291.88              | 109.50                                | 0.00002                           | 784.99                                | 0.00002                           | 207.94                                | 0.00002                           | 207.94                                | 0.00002                           | pectinesterase family protein                                                                                                                                       |
| 260561.at | 176.88              | 388.02                                | 0.00002                           | 92.51                                 | 0.00002                           | 197.59                                | 0.00002                           | 197.59                                | 0.00002                           | chitinase, putative                                                                                                                                                 |
| 260166.at | 116.70              | 97.01                                 | 0.00002                           | 1371.18                               | 0.00002                           | 119.43                                | 0.00002                           | 119.43                                | 0.00002                           | GL3 (GLABRA 2); DNA binding / transcription factor                                                                                                                  |
| 260618.at | 111.43              | 194.01                                | 0.00002                           | 64.00                                 | 0.00002                           | 111.43                                | 0.00002                           | 111.43                                | 0.00002                           | H04 (HEME OXYGENASE 4); heme oxygenase (decyclizing)/ oxidoreductase                                                                                                |
| 265672.at | 103.97              | 103.97                                | 0.00002                           | 32.00                                 | 0.00002                           | 222.86                                | 0.00002                           | 222.86                                | 0.00002                           | cysteine proteinase inhibitor-related                                                                                                                               |
| 260770.at | 103.97              | 59.71                                 | 0.00002                           | 27.86                                 | 0.00002                           | 315.17                                | 0.00002                           | 315.17                                | 0.00002                           | glycosyl hydrolase family 17 protein                                                                                                                                |
| 264423.at | 51.98               | 55.72                                 | 0.00002                           | 39.40                                 | 0.00002                           | 64.00                                 | 0.00002                           | 64.00                                 | 0.00002                           | BGLU45; hydrolase, hydrolyzing O-glycosyl compounds                                                                                                                 |
| 257163.at | 43.21               | 59.71                                 | 0.00002                           | 45.25                                 | 0.00002                           | 45.25                                 | 0.00002                           | 45.25                                 | 0.00002                           | MYB3051 (myb domain protein 305); DNA binding / transcription factor                                                                                                |
| 262711.at | 43.21               | 42.22                                 | 0.00002                           | 42.22                                 | 0.00002                           | 45.25                                 | 0.00002                           | 45.25                                 | 0.00002                           | similar to unknown protein [Arabidopsis thaliana] (TAIRAT1G37160.1); similar to unnamed protein product [Vitis vinifera] (GB:CA047911.1)                            |
| 252227.at | 42.22               | 42.22                                 | 0.00002                           | 18.38                                 | 0.00002                           | 97.01                                 | 0.00002                           | 97.01                                 | 0.00002                           | BTB/POZ domain-containing protein                                                                                                                                   |
| 251673.at | 40.32               | 55.72                                 | 0.00002                           | 16.00                                 | 0.00002                           | 73.52                                 | 0.00002                           | 73.52                                 | 0.00002                           | BG3 (BETA-1,3-L-GALACTANASE 3); hydrolase, hydrolyzing O-glycosyl compounds                                                                                         |
| 252959.at | 38.40               | 38.76                                 | 0.00002                           | 21.11                                 | 0.00002                           | 78.79                                 | 0.00002                           | 78.79                                 | 0.00002                           | proton-dependent oligopeptide transport (POT) family protein                                                                                                        |
| 259874.at | 38.40               | 48.50                                 | 0.00002                           | 18.38                                 | 0.00002                           | 68.59                                 | 0.00002                           | 68.59                                 | 0.00002                           | esterase/lipase/thioesterase family protein                                                                                                                         |
| 245159.at | 32.75               | 34.30                                 | 0.00002                           | 34.30                                 | 0.00002                           | 29.86                                 | 0.00002                           | 29.86                                 | 0.00002                           | RALFL18 (RALF-LIKE 18)                                                                                                                                              |
| 247205.at | 32.75               | 90.51                                 | 0.00002                           | 8.57                                  | 0.00002                           | 45.25                                 | 0.00002                           | 45.25                                 | 0.00002                           | PROPEP2 (Elicitor peptide 2 precursor)                                                                                                                              |
| 252555.at | 32.00               | 55.72                                 | 0.00006                           | 13.00                                 | 0.00023                           | 45.25                                 | 0.00008                           | 45.25                                 | 0.00008                           | alpha-xylotriase, putative                                                                                                                                          |
| 268912.at | 32.00               | 39.40                                 | 0.00002                           | 12.13                                 | 0.00002                           | 68.59                                 | 0.00002                           | 68.59                                 | 0.00002                           | similar to unknown protein [Arabidopsis thaliana] (TAIRAT3G01380.1); similar to l. related (Medicago truncatula) (GB:ABD32828.1); contains domain P                 |
| 249940.at | 30.55               | 59.71                                 | 0.00002                           | 48.50                                 | 0.00023                           | 9.85                                  | 0.00002                           | 9.85                                  | 0.00002                           | ANAC090 (ARABIDOPSIS NAC domain containing protein 90); transcription factor                                                                                        |
| 259574.at | 29.86               | 42.22                                 | 0.00002                           | 13.93                                 | 0.00002                           | 45.25                                 | 0.00002                           | 45.25                                 | 0.00002                           | MLP168 (MLP-LIKE PROTEIN 168)                                                                                                                                       |
| 259953.at | 29.86               | 29.86                                 | 0.00002                           | 27.86                                 | 0.00002                           | 32.00                                 | 0.00002                           | 32.00                                 | 0.00002                           | BDR5; anion exchanger                                                                                                                                               |
| 245710.at | 28.51               | 38.76                                 | 0.00002                           | 14.93                                 | 0.00002                           | 42.22                                 | 0.00002                           | 42.22                                 | 0.00002                           | carbonic dehydratase, putative / carbonate dehydratase, putative                                                                                                    |
| 267287.at | 27.86               | 42.22                                 | 0.00002                           | 17.15                                 | 0.00002                           | 32.00                                 | 0.00002                           | 32.00                                 | 0.00002                           | CYP11B9 (cytochrome P450, family 71, subfamily B, polypeptide 9); oxygen binding                                                                                    |
| 249117.at | 27.86               | 24.25                                 | 0.001336                          | 29.86                                 | 0.000035                          | 29.86                                 | 0.000046                          | 29.86                                 | 0.000046                          | AT-HSFABA (Arabidopsis thaliana heat shock transcription factor ABA); DNA binding / transcription factor                                                            |
| 264912.at | 27.22               | 39.40                                 | 0.00003                           | 14.93                                 | 0.000027                          | 34.30                                 | 0.00003                           | 34.30                                 | 0.00003                           | psuedogene, aldo/keto reductase family, contains Pfam profile PF00248; oxidoreductase, aldo/keto reductase family, blastp match of 71% identity and unknown protein |
| 266394.at | 27.22               | 34.30                                 | 0.000027                          | 13.93                                 | 0.00002                           | 42.22                                 | 0.00002                           | 42.22                                 | 0.00002                           | unknown protein                                                                                                                                                     |
| 249277.at | 25.99               | 103.97                                | 0.00002                           | 13.93                                 | 0.00002                           | 12.13                                 | 0.00002                           | 12.13                                 | 0.00002                           | GDSL-motif lipase/hydrolase family protein                                                                                                                          |
| 249491.at | 25.99               | 39.40                                 | 0.000428                          | 14.93                                 | 0.000214                          | 22.86                                 | 0.00002                           | 22.86                                 | 0.00002                           | germin-like protein, putative                                                                                                                                       |
| 249757.at | 25.99               | 21.11                                 | 0.00004                           | 38.76                                 | 0.00002                           | 22.86                                 | 0.00002                           | 22.86                                 | 0.00002                           | proline-rich family protein                                                                                                                                         |
| 260086.at | 25.40               | 78.79                                 | 0.00002                           | 9.19                                  | 0.000023                          | 22.86                                 | 0.00002                           | 22.86                                 | 0.00002                           | GDSL-motif lipase/hydrolase family protein                                                                                                                          |
| 264082.at | 24.25               | 24.25                                 | 0.00002                           | 19.70                                 | 0.00002                           | 29.86                                 | 0.00002                           | 29.86                                 | 0.00002                           | unknown protein                                                                                                                                                     |
| 259735.at | 23.70               | 25.99                                 | 0.00002                           | 17.15                                 | 0.00002                           | 29.86                                 | 0.00002                           | 29.86                                 | 0.00002                           | unknown protein                                                                                                                                                     |
| 253459.at | 22.63               | 73.52                                 | 0.00002                           | 14.93                                 | 0.00002                           | 10.56                                 | 0.00002                           | 10.56                                 | 0.00002                           | unknown protein                                                                                                                                                     |
| 253782.at | 22.11               | 21.11                                 | 0.00002                           | 24.25                                 | 0.00002                           | 24.25                                 | 0.00002                           | 24.25                                 | 0.00002                           | dihydrooxonotriose aldolase, putative                                                                                                                               |
| 247213.at | 22.11               | 27.86                                 | 0.00002                           | 14.93                                 | 0.00002                           | 25.99                                 | 0.00002                           | 25.99                                 | 0.00002                           | ATPEP1/PROPEP1 (Elicitor peptide 1 precursor)                                                                                                                       |
| 250702.at | 21.61               | 19.70                                 | 0.00002                           | 12.13                                 | 0.00002                           | 42.22                                 | 0.00002                           | 42.22                                 | 0.00002                           | peroxidase, putative                                                                                                                                                |
| 255924.at | 21.11               | 22.63                                 | 0.00002                           | 22.63                                 | 0.00002                           | 18.38                                 | 0.00002                           | 18.38                                 | 0.00002                           | phosphoglycerate/bisphosphoglycerate mutase family protein                                                                                                          |
| 261737.at | 21.11               | 21.11                                 | 0.000035                          | 13.93                                 | 0.000214                          | 32.00                                 | 0.000552                          | 32.00                                 | 0.000552                          | leucine-rich repeat family protein                                                                                                                                  |
| 259556.at | 20.16               | 17.15                                 | 0.00002                           | 19.70                                 | 0.00002                           | 24.25                                 | 0.00002                           | 24.25                                 | 0.00002                           | hydrolase, alpha/beta fold family protein                                                                                                                           |
| 261965.at | 20.16               | 18.38                                 | 0.00002                           | 14.93                                 | 0.00002                           | 14.93                                 | 0.00002                           | 14.93                                 | 0.00002                           | ATMKK7 (MAP KINASE KINASE 7); kinase                                                                                                                                |
| 264638.at | 19.70               | 29.86                                 | 0.00002                           | 13.93                                 | 0.00002                           | 18.38                                 | 0.00002                           | 18.38                                 | 0.00002                           | FL FLOWERING LOCUS T                                                                                                                                                |
| 262843.at | 19.25               | 9.85                                  | 0.00002                           | 51.98                                 | 0.00002                           | 13.93                                 | 0.000552                          | 13.93                                 | 0.000552                          | ATHB32 (ARABIDOPSIS THALIANA HOMEBOX PROTEIN 32); DNA binding / transcription factor                                                                                |
| 250344.at | 18.81               | 24.25                                 | 0.00002                           | 14.93                                 | 0.00002                           | 19.70                                 | 0.00002                           | 19.70                                 | 0.00002                           | glutaredoxin family protein                                                                                                                                         |
| 263841.at | 18.81               | 19.70                                 | 0.00002                           | 17.15                                 | 0.00002                           | 19.70                                 | 0.00002                           | 19.70                                 | 0.00002                           | xyloglucan/xyloglucosyl transferase, putative / xyloglucan endotransglycosylase, putative / endo-xyloglucan transferase, putative                                   |
| 263944.at | 18.81               | 34.30                                 | 0.00006                           | 8.00                                  | 0.00002                           | 24.25                                 | 0.000167                          | 24.25                                 | 0.000167                          | transposable element, gene                                                                                                                                          |
| 250776.at | 17.55               | 13.93                                 | 0.00002                           | 16.00                                 | 0.00002                           | 16.00                                 | 0.00002                           | 16.00                                 | 0.00002                           | monooxygenase, putative (MO3)                                                                                                                                       |
| 251627.at | 17.55               | 9.85                                  | 0.00002                           | 17.15                                 | 0.00002                           | 32.00                                 | 0.00002                           | 32.00                                 | 0.00002                           | BG1 (BETA-1,3-L-GALACTANASE 1); hydrolase, hydrolyzing O-glycosyl compounds                                                                                         |
| 247447.at | 17.15               | 13.00                                 | 0.000114                          | 4.00                                  | 0.000078                          | 97.01                                 | 0.00002                           | 97.01                                 | 0.00002                           | proton-dependent oligopeptide transport (POT) family protein                                                                                                        |
| 247448.at | 17.15               | 16.00                                 | 0.00002                           | 16.00                                 | 0.00002                           | 19.70                                 | 0.00002                           | 19.70                                 | 0.00002                           | similar to unknown protein [Arabidopsis thaliana] (TAIRAT3G27880.1); similar to unknown protein [Vitis vinifera] (GB:CAN65788.1); contains InterF                   |
| 250734.at | 17.15               | 16.00                                 | 0.00002                           | 17.15                                 | 0.00002                           | 18.38                                 | 0.00002                           | 18.38                                 | 0.00002                           | similar to unknown protein [Arabidopsis thaliana] (TAIRAT3G1600.1); similar to unnamed protein product [Vitis vinifera] (GB:CA015841.1)                             |
| 252388.at | 17.15               | 13.00                                 | 0.00002                           | 13.00                                 | 0.000027                          | 29.86                                 | 0.00002                           | 29.86                                 | 0.00002                           | CYP94B3 (cytochrome P450, family 94, subfamily B, polypeptide 3); oxygen binding                                                                                    |
| 264900.at | 17.15               | 24.25                                 | 0.00002                           | 6.00                                  | 0.00002                           | 25.99                                 | 0.00002                           | 25.99                                 | 0.00002                           | GP72 (glucose-6-phosphate phosphatase translocator 2; antiporter / glucose-6-phosphate transmembrane transporter                                                    |
| 249965.at | 16.78               | 19.70                                 | 0.00002                           | 13.93                                 | 0.00002                           | 12.13                                 | 0.00002                           | 12.13                                 | 0.00002                           | similar to unknown protein [Arabidopsis thaliana] (TAIRAT3G2340.1); similar to unknown protein [Arabidopsis thaliana] (TAIRAT3G2340.1); similar to                  |
| 258306.at | 16.00               | 14.93                                 | 0.000114                          | 4.59                                  | 0.000023                          | 59.71                                 | 0.00002                           | 59.71                                 | 0.00002                           | ATZIP42 (ARABIDOPSIS THALIANA BASIC LEUCINE-ZIPPER); DNA binding / protein heterodimerization / protein homodimerization / transcription                            |
| 256602.at | 15.63               | 48.50                                 | 0.00003                           | 4.00                                  | 0.00006                           | 4.00                                  | 0.000046                          | 4.00                                  | 0.000046                          | similar to AT14A [Arabidopsis thaliana] (TAIRAT3G28290.1); similar to AT14A [Arabidopsis thaliana] (TAIRAT3G28290.1); contains InterPro domain P                    |
| 257082.at | 15.63               | 19.70                                 | 0.00002                           | 34.30                                 | 0.000078                          | 5.66                                  | 0.000389                          | 5.66                                  | 0.000389                          | COBL10 (COBRA-LIKE PROTEIN 10 PRECURSOR)                                                                                                                            |
| 266392.at | 15.28               | 39.40                                 | 0.000147                          | 4.92                                  | 0.000225                          | 18.38                                 | 0.000037                          | 18.38                                 | 0.000037                          | M10                                                                                                                                                                 |
| 255364.at | 14.83               | 6.96                                  | 0.00002                           | 6.96                                  | 0.00002                           | 18.38                                 | 0.00002                           | 18.38                                 | 0.00002                           | WRKY87 (WRKY DNA-binding protein 87); transcription factor                                                                                                          |
| 248807.at | 14.59               | 21.11                                 | 0.00002                           | 14.93                                 | 0.00002                           | 9.85                                  | 0.00002                           | 9.85                                  | 0.00002                           | pectinesterase family protein                                                                                                                                       |
| 260046.at | 14.59               | 16.00                                 | 0.00002                           | 9.19                                  | 0.00002                           | 21.11                                 | 0.00002                           | 21.11                                 | 0.00002                           | calmodulin binding                                                                                                                                                  |
| 245194.at | 14.25               | 17.15                                 | 0.00002                           | 12.13                                 | 0.00002                           | 13.93                                 | 0.00002                           | 13.93                                 | 0.00002                           | protein phosphatase 2C, putative / PP2C, putative                                                                                                                   |
| 248545.at | 14.25               | 17.15                                 | 0.00002                           | 8.57                                  | 0.000023                          | 19.70                                 | 0.00002                           | 19.70                                 | 0.00002                           | cysteine proteinase, putative                                                                                                                                       |
| 250583.at | 13.93               | 38.76                                 | 0.00002                           | 6.96                                  | 0.00002                           | 10.56                                 | 0.00002                           | 10.56                                 | 0.00002                           | PE1; nucleic acid binding / transcription factor                                                                                                                    |
| 264632.at | 13.83               | 88.59                                 | 0.00013                           | 6.96                                  | 0.000068                          | 6.96                                  | 0.00002                           | 6.96                                  | 0.00002                           | lecithin:cholesterol acyltransferase family protein / LACT family protein                                                                                           |
| 264566.at | 13.83               | 11.31                                 | 0.00002                           | 13.93                                 | 0.00002                           | 13.93                                 | 0.00002                           | 13.93                                 | 0.00002                           | similar to unknown protein [Arabidopsis thaliana] (TAIRAT3G2310.1)                                                                                                  |
| 257766.at | 13.61               | 21.11                                 | 0.00002                           | 12.13                                 | 0.00002                           | 9.85                                  | 0.00002                           | 9.85                                  | 0.00002                           | similar to unknown protein [Arabidopsis thaliana] (TAIRAT3G1000.2); similar to transcription factor [Arabidopsis thaliana] (TAIRAT3G1000.1); similar                |
| 258746.at | 13.61               | 64.00                                 | 0.00002                           | 5.66                                  | 0.00002                           | 6.96                                  | 0.000035                          | 6.96                                  | 0.000035                          | germin-like protein, putative                                                                                                                                       |
| 264130.at | 13.61               | 13.00                                 | 0.00002                           | 12.13                                 | 0.00002                           | 16.00                                 | 0.00002                           | 16.00                                 | 0.00002                           | similar to unknown protein [Arabidopsis thaliana] (TAIRAT1G18500.1); similar to unnamed protein product [Vitis vinifera] (GB:CA047911.1)                            |
| 245276.at | 13.30               | 13.00                                 | 0.00002                           | 9.85                                  | 0.00002                           | 18.38                                 | 0.00002                           | 18.38                                 | 0.00002                           | ATHB-2 (ARABIDOPSIS THALIANA HOMEBOX PROTEIN 2); DNA binding / transcription factor                                                                                 |
| 246144.at | 13.30               | 12.13                                 | 0.00002                           | 10.56                                 | 0.00002                           | 13.93                                 | 0.00002                           | 13.93                                 | 0.00002                           | yeast light chain, putative                                                                                                                                         |
| 254425.at | 13.30               | 5.66                                  | 0.00002                           | 5.66                                  | 0.00003                           | 13.93                                 | 0.00002                           | 13.93                                 | 0.00002                           | similar to unknown protein [Arabidopsis thaliana] (TAIRAT4G05018.1); similar to unnamed protein product [Vitis vinifera] (GB:CA018665.1)                            |
| 264655.at | 13.00               | 5.66                                  | 0.00002                           | 13.93                                 | 0.00002                           | 13.00                                 | 0.00002                           | 13.00                                 | 0.00002                           | fringe-related protein                                                                                                                                              |
| 261712.at | 13.00               | 18.38                                 | 0.00002                           | 9.85                                  | 0.00002                           | 12.13                                 | 0.00002                           | 12.13                                 | 0.00002                           | alcohol dehydrogenase, putative                                                                                                                                     |
| 249004.at | 12.70               | 4.59                                  | 0.000189                          | 12.13                                 | 0.000818                          | 38.76                                 | 0.00002                           | 38.76                                 | 0.00002                           | unknown protein                                                                                                                                                     |
| 254773.at | 12.70               | 27.86                                 | 0.00002                           | 6.00                                  | 0.000046                          | 12.13                                 | 0.00002                           | 12.13                                 | 0.00002                           | ATCSLA15 (Cellulose synthase-like A15); transferase, transferring glycosyl groups                                                                                   |
| 266321.at | 12.70               | 13.93                                 | 0.00002                           | 11.31                                 | 0.00002                           | 13.00                                 | 0.00002                           | 13.00                                 | 0.00002                           | CYP7B48 (cytochrome P450, family 78, subfamily A, polypeptide 8); oxygen binding                                                                                    |
| 254585.at | 12.41               | 13.00                                 | 0.00002                           | 12.13                                 | 0.00002                           | 12.13                                 | 0.00002                           | 12.13                                 | 0.00002                           | AT1BYB6 (BZIP/WRKY-LIKE 6); DNA binding / protein binding / transcription factor / transcription regulator                                                          |
| 248247.at | 12.41               | 7.46                                  | 0.00002                           | 14.93                                 | 0.000023                          | 17.15                                 | 0.000023                          | 17.15                                 | 0.000023                          | SPECH (SPEECHLESS); DNA binding / transcription factor                                                                                                              |
| 252143.at | 12.13               | 16.00                                 | 0.00002                           | 12.13                                 | 0.00002                           | 9.19                                  | 0.00002                           | 9.19                                  | 0.00002                           | kinasin motor family protein                                                                                                                                        |
| 250968.at | 11.85               |                                       |                                   |                                       |                                   |                                       |                                   |                                       |                                   |                                                                                                                                                                     |

|           |           |     |       |          |       |          |       |          |                                                                                                                                                      |
|-----------|-----------|-----|-------|----------|-------|----------|-------|----------|------------------------------------------------------------------------------------------------------------------------------------------------------|
| 255577.at | AT4G01410 | 729 | 6.50  | 0.00002  | 8.00  | 0.00002  | 7.46  | 0.000027 | harpin-induced family protein / HBN1 family protein / harpin-responsive family protein                                                               |
| 261846.at | AT1G11540 | 729 | 6.96  | 0.00002  | 6.96  | 0.00002  | 8.00  | 0.000002 | similar to unknown protein [Arabidopsis thaliana] (TAIRAT1G11540.1); similar to unnamed protein product [Vitis vinifera] (GB:CAO38814.1); contains   |
| 264129.at | AT1G09170 | 729 | 3.48  | 0.00167  | 4.00  | 0.00023  | 27.86 | 0.000008 | unknown protein                                                                                                                                      |
| 267591.at | AT2G28705 | 729 | 5.66  | 0.00002  | 6.96  | 0.00002  | 7.46  | 0.000002 | DVL1/RTFL8 (ROTUNDIFOLIA LIKE 8)                                                                                                                     |
| 245886.at | AT5G11020 | 713 | 7.46  | 0.00002  | 6.50  | 0.00002  | 7.46  | 0.000002 | kinase                                                                                                                                               |
| 246989.at | AT5G67350 | 713 | 4.59  | 0.00002  | 8.00  | 0.00002  | 9.85  | 0.000002 | unknown protein                                                                                                                                      |
| 251370.at | AT3G06450 | 713 | 7.46  | 0.00002  | 6.06  | 0.00002  | 8.00  | 0.000002 | similar to unknown protein [Arabidopsis thaliana] (TAIRAT3G06450.1); similar to unnamed protein product [Vitis vinifera] (GB:CAO70569.1); contains   |
| 255025.at | AT4G09900 | 713 | 8.00  | 0.00002  | 5.66  | 0.00002  | 8.00  | 0.000002 | hydrolase, alpha/beta fold family protein                                                                                                            |
| 262790.at | AT1G16390 | 713 | 6.06  | 0.00002  | 8.57  | 0.00002  | 6.96  | 0.000002 | ATDCT3 (ARABIDOPSIS THALIANA ORGANIC CATION/CARNITINE TRANSPORTER2); carboxylate transmembrane transporter/ sugar/hydrogen i                         |
| 263931.at | AT2G32220 | 713 | 6.96  | 0.00002  | 6.96  | 0.00002  | 6.96  | 0.000002 | similar to unknown protein [Arabidopsis thaliana] (TAIRAT2G32220.1); similar to unnamed protein product [Vitis vinifera] (GB:CAO15901.1)             |
| 245982.at | AT5G13170 | 696 | 9.19  | 0.00002  | 4.59  | 0.00006  | 7.46  | 0.000002 | unknown protein                                                                                                                                      |
| 246036.at | AT5G08370 | 696 | 9.19  | 0.00002  | 6.50  | 0.00002  | 5.66  | 0.000002 | ATAGAL2 (ARABIDOPSIS THALIANA ALPHA-GALACTOSIDASE 2); alpha-galactosidase                                                                            |
| 260544.at | AT2G43540 | 696 | 7.46  | 0.00002  | 5.66  | 0.00002  | 8.00  | 0.000002 | similar to hypothetical protein [Vitis vinifera] (GB:CAN5294.1)                                                                                      |
| 253066.at | AT4G37770 | 681 | 6.06  | 0.00002  | 4.59  | 0.00002  | 11.31 | 0.000002 | ACS8 (1-Amino-cyclopropane-1-carboxylate synthase 8)                                                                                                 |
| 261580.at | AT1G01110 | 681 | 9.19  | 0.00002  | 3.73  | 0.00002  | 8.19  | 0.000114 | IDO18 (IQ-domain 18)                                                                                                                                 |
| 261126.at | AT2G25920 | 681 | 5.66  | 0.00002  | 5.66  | 0.00002  | 10.56 | 0.000002 | ectopic putative                                                                                                                                     |
| 267631.at | AT2S42150 | 681 | 11.31 | 0.000114 | 4.29  | 0.00002  | 6.50  | 0.000002 | DNA-binding bromodomain-containing protein                                                                                                           |
| 264953.at | AT1G77120 | 681 | 13.93 | 0.00002  | 2.64  | 0.00002  | 8.57  | 0.000002 | ADH1 (ALCOHOL DEHYDROGENASE 1)                                                                                                                       |
| 251491.at | AT3G58480 | 665 | 5.66  | 0.00002  | 5.66  | 0.00002  | 9.19  | 0.000002 | pH8-type carbohydrate kinase family protein                                                                                                          |
| 255911.at | AT1G66930 | 665 | 2.46  | 0.00249  | 9.19  | 0.004073 | 13.00 | 0.000307 | serine/threonine protein kinase family protein                                                                                                       |
| 258300.at | AT3G23340 | 650 | 8.00  | 0.00002  | 7.46  | 0.00002  | 4.59  | 0.000002 | CK1.10 (Casein Kinase I-like 10); casein kinase I/ kinase                                                                                            |
| 253024.at | AT5G16270 | 650 | 6.50  | 0.00002  | 6.96  | 0.00023  | 6.96  | 0.000002 | ANAC087; transcription factor                                                                                                                        |
| 250671.at | AT5G06710 | 650 | 7.46  | 0.00002  | 6.06  | 0.00002  | 6.06  | 0.000002 | similar to unknown protein [Arabidopsis thaliana] (TAIRAT2G38420.1); similar to unnamed protein product [Vitis vinifera] (GB:CAO15955.1)             |
| 253165.at | AT4G35320 | 650 | 6.96  | 0.00002  | 6.96  | 0.00002  | 5.66  | 0.000002 | similar to unknown protein [Arabidopsis thaliana] (TAIRAT2G17300.1); similar to hypothetical protein [Vitis vinifera] (GB:CAN78386.1)                |
| 257483.at | AT1G49620 | 650 | 6.96  | 0.00002  | 7.46  | 0.00002  | 5.66  | 0.000002 | ICK5/ICN6/KRP7 (KIP-RELATED PROTEIN 7); cyclin binding / cyclin-dependent protein kinase inhibitor                                                   |
| 262188.at | AT1G77810 | 650 | 6.96  | 0.000035 | 5.66  | 0.000027 | 6.96  | 0.000023 | galactosyltransferase family protein                                                                                                                 |
| 264931.at | AT1G06590 | 650 | 11.31 | 0.00002  | 6.50  | 0.00002  | 3.73  | 0.000002 | polygalacturonase, putative / pectinase, putative                                                                                                    |
| 267077.at | AT5G40970 | 650 | 6.96  | 0.00002  | 6.96  | 0.00002  | 5.66  | 0.000002 | myb family transcription factor                                                                                                                      |
| 261781.at | AT2G44210 | 650 | 6.96  | 0.00002  | 6.96  | 0.00002  | 6.96  | 0.000002 | similar to unknown protein [Arabidopsis thaliana] (TAIRAT1G55360.1); similar to unnamed protein product [Vitis vinifera] (GB:CAO87164.1); contains   |
| 249202.at | AT5G42580 | 635 | 8.57  | 0.00002  | 4.59  | 0.000088 | 6.50  | 0.000002 | CYP705A12 (cytochrome P450, family 705, subfamily A, polypptide 12); oxygen binding                                                                  |
| 255964.at | AT1G22275 | 635 | 4.92  | 0.000078 | 21.11 | 0.000035 | 2.46  | 0.001832 | ZYP1b                                                                                                                                                |
| 257469.at | AT1G49290 | 635 | 8.00  | 0.000241 | 4.92  | 0.000189 | 6.50  | 0.000078 | similar to unknown protein [Arabidopsis thaliana] (TAIRAT5G13820.1); similar to hypothetical protein [Vitis vinifera] (GB:CAN72326.1)                |
| 264226.at | AT1G06710 | 635 | 8.57  | 0.00002  | 6.06  | 0.00002  | 4.92  | 0.000002 | leucine-rich repeat family protein                                                                                                                   |
| 265291.at | AT2G42990 | 635 | 13.93 | 0.00002  | 3.83  | 0.00002  | 6.06  | 0.000023 | QDSL-modII lipase/hydrolase family protein                                                                                                           |
| 246822.at | AT5G25960 | 620 | 4.00  | 0.000048 | 2.46  | 0.000037 | 24.25 | 0.000048 | QDSL-modII lipase/hydrolase family protein                                                                                                           |
| 260565.at | AT2G43800 | 620 | 6.96  | 0.00002  | 5.28  | 0.00002  | 6.50  | 0.000002 | formin homology 2 domain-containing protein / FH2 domain-containing protein                                                                          |
| 267181.at | AT2G37780 | 620 | 7.46  | 0.00002  | 5.28  | 0.000023 | 6.06  | 0.000002 | aldo/keto reductase family protein                                                                                                                   |
| 248253.at | AT5G53290 | 606 | 3.48  | 0.00002  | 10.56 | 0.000023 | 6.06  | 0.000002 | CRF3 (CYTOKININ RESPONSE FACTOR 3); DNA binding / transcription factor                                                                               |
| 246019.at | AT5G10720 | 592 | 6.96  | 0.00002  | 6.50  | 0.00003  | 4.59  | 0.000002 | AHK5 (CYTOKININ INDEPENDENT 2)                                                                                                                       |
| 250173.at | AT5G14340 | 592 | 6.96  | 0.00002  | 4.59  | 0.000033 | 6.50  | 0.000002 | AMV10 (myb domain protein 40); DNA binding / transcription factor                                                                                    |
| 250802.at | AT5G04970 | 592 | 5.66  | 0.00004  | 14.83 | 0.00003  | 6.96  | 0.000026 | pectinesterase, putative                                                                                                                             |
| 253769.at | AT4G28560 | 592 | 5.66  | 0.00013  | 8.57  | 0.000307 | 4.59  | 0.000046 | RC7 (ROP-INTERACTIVE CRIB MOTIF-CONTAINING PROTEIN 7); protein binding                                                                               |
| 256877.at | AT3G28470 | 592 | 6.06  | 0.00002  | 4.92  | 0.00002  | 6.96  | 0.000002 | similar to ADRI-1 (ADRI-LIKE 1), ATP binding / protein binding [Arabidopsis thaliana] (TAIRAT4G33002.1); similar to ADRI-1 (ADRI-LIKE 1), AT         |
| 261953.at | AT1G64440 | 592 | 6.06  | 0.00002  | 6.96  | 0.00002  | 5.28  | 0.000002 | RHD1 (ROOT HAIR DEFECTIVE 1); UDP-glucose 4-epimerase                                                                                                |
| 246885.at | AT5G40680 | 592 | 6.50  | 0.00002  | 5.28  | 0.00002  | 6.06  | 0.000002 | similar to unknown protein [Arabidopsis thaliana] (TAIRAT2G10930.1)                                                                                  |
| 246885.at | AT5G40680 | 592 | 6.50  | 0.00002  | 5.28  | 0.00002  | 6.06  | 0.000002 | transferase family protein                                                                                                                           |
| 244489.at | AT5G36900 | 592 | 4.00  | 0.00002  | 4.92  | 0.000052 | 10.56 | 0.000002 | ATP12G/PTR3/PEPTIDE TRANSPORTER PROTEIN 3); transporter                                                                                              |
| 249323.at | AT5G46050 | 579 | 6.96  | 0.00002  | 4.29  | 0.00002  | 6.96  | 0.000002 | ATAF1 (Arabidopsis NAC domain containing protein 2); transcription factor                                                                            |
| 261564.at | AT1G01120 | 579 | 4.59  | 0.00002  | 6.50  | 0.00002  | 6.50  | 0.000002 | ATEX070H8 (exocyst subunit EXO70 family protein H8); protein binding                                                                                 |
| 263439.at | AT2G28650 | 579 | 8.00  | 0.00002  | 3.73  | 0.00002  | 6.50  | 0.000002 | ATDCH18 (cation/hydrogen exchanger 18); monovalent cation/proton antiporter                                                                          |
| 249255.at | AT5G41610 | 579 | 27.86 | 0.000023 | 1.87  | 0.000493 | 3.73  | 0.000027 | similar to unknown protein [Arabidopsis thaliana] (TAIRAT2G38995.1); similar to unnamed protein product [Vitis vinifera] (GB:CAO48523.1); contains   |
| 249614.at | AT5G37300 | 579 | 39.40 | 0.000046 | 2.30  | 0.000582 | 2.14  | 0.004073 | AP2 domain-containing transcription factor family protein                                                                                            |
| 260856.at | AT1G21910 | 579 | 3.25  | 0.00002  | 6.96  | 0.00002  | 8.57  | 0.000002 | binding                                                                                                                                              |
| 250961.at | AT1G05990 | 579 | 6.96  | 0.00002  | 4.29  | 0.00002  | 5.28  | 0.000002 | MUM4 (MUCLAGE-MODIFIED 4); catalytic                                                                                                                 |
| 260865.at | AT1G53550 | 579 | 6.96  | 0.00002  | 5.66  | 0.00002  | 5.28  | 0.000002 | leucine-rich repeat transmembrane protein kinase, putative                                                                                           |
| 261434.at | AT1G07650 | 579 | 6.96  | 0.00002  | 4.92  | 0.00002  | 5.66  | 0.000002 | transposable element gene                                                                                                                            |
| 265979.at | AT2G11150 | 579 | 7.46  | 0.00023  | 7.46  | 0.00002  | 3.48  | 0.001077 | aspartyl protease family protein                                                                                                                     |
| 257897.at | AT3G12700 | 566 | 6.06  | 0.00002  | 4.59  | 0.00002  | 6.50  | 0.000002 | heavy-metal-associated domain-containing protein                                                                                                     |
| 247394.at | AT5G06800 | 566 | 5.66  | 0.00002  | 4.29  | 0.000052 | 7.46  | 0.000002 | similar to unknown protein [Arabidopsis thaliana] (TAIRAT5G06820.1)                                                                                  |
| 250871.at | AT5G03950 | 566 | 8.57  | 0.000101 | 2.46  | 0.00002  | 5.28  | 0.000027 | glycosyl hydrolase family 18 protein                                                                                                                 |
| 254544.at | AT4G19820 | 566 | 6.50  | 0.00002  | 5.28  | 0.00003  | 5.66  | 0.000002 | PGP9 (P-GLYCOPROTEIN 9); ATPase, coupled to transmembrane movement of substances                                                                     |
| 254710.at | AT4G18050 | 566 | 8.57  | 0.00002  | 3.03  | 0.00002  | 6.96  | 0.000021 | similar to unknown [Populus trichocarpa] (GB:ABK94840.1)                                                                                             |
| 261675.at | AT1G18290 | 566 | 3.48  | 0.000068 | 18.28 | 0.001336 | 2.83  | 0.000024 | ATPME2 (Arabidopsis thaliana pectin methyltransferase 2)                                                                                             |
| 262198.at | AT1G53830 | 566 | 5.66  | 0.00002  | 5.28  | 0.00002  | 6.06  | 0.000002 | tropomyosin-related                                                                                                                                  |
| 262538.at | AT1G11740 | 566 | 6.06  | 0.00002  | 5.28  | 0.00002  | 5.66  | 0.000002 | DRE5 (DSSRNA-BINDING PROTEIN 5); double-stranded RNA binding                                                                                         |
| 246338.at | AT1G10710 | 566 | 6.06  | 0.00002  | 4.92  | 0.00002  | 6.96  | 0.000002 | ATL2H2 (chlorophyll-chlorophyllide hydrolase 2)                                                                                                      |
| 246091.at | AT5G43660 | 553 | 6.96  | 0.000048 | 4.29  | 0.00002  | 6.50  | 0.000002 | SLAH2 (SLAC1 HOMOLOGUE 2); transporter                                                                                                               |
| 253828.at | AT4G27970 | 553 | 5.66  | 0.00002  | 5.66  | 0.00002  | 5.28  | 0.000002 | nodulin MN21 family protein                                                                                                                          |
| 257300.at | AT3G28080 | 553 | 6.96  | 0.00002  | 4.29  | 0.00002  | 5.66  | 0.000002 | similar to unknown protein [Arabidopsis thaliana] (TAIRAT3G54200.1); similar to plant cell wall protein SITFR88 [Lycopersicon esculentum] (GB:BF3    |
| 266596.at | AT2G46150 | 553 | 6.50  | 0.00002  | 4.29  | 0.00002  | 4.92  | 0.000002 | zinc ion binding                                                                                                                                     |
| 246283.at | AT4G36860 | 553 | 6.50  | 0.00002  | 5.28  | 0.00002  | 4.92  | 0.000002 | tetratricopeptide repeat (TPR)-containing protein                                                                                                    |
| 247229.at | AT5G08190 | 553 | 3.73  | 0.00002  | 9.19  | 0.00002  | 4.92  | 0.000101 | periodic 17 (PER17.1) P17                                                                                                                            |
| 264001.at | AT2G24200 | 553 | 8.00  | 0.00002  | 3.03  | 0.00002  | 6.96  | 0.000002 | CKK3 (CYTOKININ OXIDASE 3); cytokinin dehydrogenase                                                                                                  |
| 247956.at | AT5G56970 | 540 | 5.28  | 0.00003  | 4.92  | 0.000046 | 6.50  | 0.000002 | protein kinase, putative                                                                                                                             |
| 249361.at | AT5G40540 | 540 | 5.28  | 0.00002  | 5.28  | 0.00002  | 5.66  | 0.000002 | GRAM domain-containing protein / ABA-responsive protein-related                                                                                      |
| 250279.at | AT5G13200 | 540 | 5.66  | 0.00002  | 4.00  | 0.00002  | 6.96  | 0.000002 | MYB108 (MYB DOMAIN PROTEIN 108); DNA binding / transcription factor                                                                                  |
| 258516.at | AT3G06490 | 540 | 5.28  | 0.00002  | 4.59  | 0.00013  | 6.50  | 0.000004 | ML04 (MILDEW RESISTANCE LOCUS O 4); calmodulin binding                                                                                               |
| 260483.at | AT1G11000 | 540 | 5.66  | 0.00002  | 4.92  | 0.00002  | 5.66  | 0.000002 | ATA8C (METACASPASE 1); caspase                                                                                                                       |
| 262723.at | AT1G11420 | 540 | 9.19  | 0.00002  | 3.48  | 0.000023 | 3.03  | 0.000068 | SOCL23 (serine carboxypeptidase-like 23); serine carboxypeptidase                                                                                    |
| 265655.at | AT2G24010 | 540 | 2.64  | 0.000533 | 18.70 | 0.000438 | 3.03  | 0.000002 | curculin-like (mannose-binding) lectin family protein                                                                                                |
| 249983.at | AT5G18470 | 528 | 6.50  | 0.00002  | 6.06  | 0.00002  | 7.46  | 0.000002 | hydroxyproline-rich glycoprotein family protein                                                                                                      |
| 247958.at | AT5G57070 | 528 | 6.06  | 0.00002  | 6.06  | 0.00002  | 4.00  | 0.000002 | similar to unknown protein [Arabidopsis thaliana] (TAIRAT5G06270.1); similar to unnamed protein product [Vitis vinifera] (GB:CAO15841.1); similar to |
| 249941.at | AT5G22270 | 528 | 4.29  | 0.00002  | 4.29  | 0.00002  | 8.00  | 0.000002 | strobilactone synthase family protein                                                                                                                |
| 260398.at | AT1G40110 | 528 | 4.59  | 0.00002  | 3.73  | 0.00002  | 8.57  | 0.000002 | endoglucanase/transucanase/glycohydrolase family protein                                                                                             |
| 258011.at | AT2G37440 | 528 | 6.06  | 0.00004  | 6.50  | 0.00002  | 6.96  | 0.000002 | ATPEN1 (PUTATIVE PENTACYCLIC TRITERPENE SYNTHASE 3); catalytic/ lipoel synthase                                                                      |
| 249687.at | AT5G25150 | 516 | 6.06  | 0.00013  | 2.30  | 0.001851 | 8.57  | 0.000023 | NIC3 (NICOTINAMIDASE 3); catalytic/ nicotinamidase                                                                                                   |
| 249848.at | AT5G23220 | 516 | 6.50  | 0.00002  | 3.73  | 0.00002  | 5.66  | 0.000002 | AMV56 (myb domain protein 56); DNA binding / transcription factor                                                                                    |
| 250051.at | AT5G17800 | 516 | 7.46  | 0.000052 | 3.73  | 0.00002  | 4.92  | 0.000078 | oxidoreductase, ZOG-Fe(II) oxygenase family protein                                                                                                  |
| 252530.at | AT3G46500 | 516 | 5.66  | 0.00002  | 6.06  | 0.00003  | 4.00  | 0.000006 | Encodes a Gibberellin-regulated GASA/GAST/Slavin family protein                                                                                      |
| 265331.at | AT2G18420 | 516 | 12.13 | 0.00003  | 1.87  | 0.005983 | 6.06  | 0.000035 | protein kinase family protein                                                                                                                        |
| 265405.at | AT2G18750 | 516 | 6.96  | 0.00002  | 5.66  | 0.00002  | 4.92  | 0.000002 | AAO1 (ALDEHYDE OXIDASE 1)                                                                                                                            |
| 246133.at | AT5G20960 | 504 | 4.59  | 0.00002  | 4.59  | 0.00002  | 6.06  | 0.000002 | zinc finger (GATA type) family protein                                                                                                               |
| 251373.at | AT3G60530 | 504 | 4.00  | 0.00002  | 5.66  | 0.00002  | 5.66  | 0.000002 | ETR2 (ETHYLENE RESPONSE 2); receptor                                                                                                                 |
| 257922.at | AT3G23150 | 504 | 6.06  | 0.00002  | 4.00  | 0.000467 | 5.28  | 0.000002 | transferase family protein                                                                                                                           |
| 264403.at | AT2G25150 | 504 | 5.66  | 0.00002  | 3.73  | 0.000046 | 6.06  | 0.000023 | acyl-fatty-carrier-protein desaturase, putative / stearyl-ACP desaturase, putative                                                                   |
| 264502.at | AT5G16240 | 492 | 4.92  | 0.00002  | 5.66  | 0.00002  | 4.29  | 0.000002 | short-chain dehydrogenase/reductase (SDR) family protein                                                                                             |
| 251013.at | AT5G02540 | 492 | 3.83  | 0.00002  | 4.92  | 0.00002  | 6.96  | 0.000027 | auxin-responsive family protein                                                                                                                      |
| 251291.at | AT3G61900 | 492 | 4.29  | 0.00002  | 4.59  | 0.00003  | 6.06  | 0.000002 | MYB51 (MYB DOMAIN PROTEIN 51); DNA binding / transcription factor                                                                                    |
| 255753.at | AT1G18570 | 492 | 4.29  | 0.00002  | 2.83  | 0.00002  | 9.85  | 0.000002 | NLA (N                                                                                                                                               |

|           |           |      |       |          |      |          |      |          |                                                                                                                                                                                                          |
|-----------|-----------|------|-------|----------|------|----------|------|----------|----------------------------------------------------------------------------------------------------------------------------------------------------------------------------------------------------------|
| 245628.at | AT1G56650 | 4.19 | 6.50  | 0.000078 | 3.48 | 0.001651 | 3.25 | 0.003355 | PAP1 (PRODUCTION OF ANTHOCYANIN PIGMENT 1); DNA binding / transcription factor                                                                                                                           |
| 247382.at | AT5G63410 | 4.19 | 6.06  | 0.00002  | 3.73 | 0.00002  | 3.25 | 0.00002  | leucine-rich repeat transmembrane protein kinase, putative                                                                                                                                               |
| 248443.at | AT5G51310 | 4.19 | 4.00  | 0.00002  | 4.59 | 0.000023 | 4.00 | 0.00002  | gibberellin 20-oxidase-related                                                                                                                                                                           |
| 248135.at | AT1G68400 | 4.19 | 3.48  | 0.000027 | 4.59 | 0.00002  | 4.00 | 0.00002  | calmodulin-related protein, putative                                                                                                                                                                     |
| 245336.at | AT4G16151 | 4.19 | 4.92  | 0.00002  | 3.48 | 0.00002  | 4.29 | 0.00002  | unknown protein                                                                                                                                                                                          |
| 249747.at | AT5G24600 | 4.19 | 5.28  | 0.00002  | 2.83 | 0.000078 | 4.92 | 0.000023 | similar to unknown protein [Arabidopsis thaliana] (TAIRAT3G18215.1); similar to unnamed protein product [Vitis vinifera] (GB:CAO65983.1); contains 1 zinc finger (C3HC4-type RING finger) family protein |
| 251066.at | AT5G01880 | 4.19 | 8.00  | 0.000052 | 2.46 | 0.000052 | 3.73 | 0.000088 | HR4 (HOMOLOG OF RPW8 4)                                                                                                                                                                                  |
| 252170.at | AT3G50480 | 4.19 | 3.48  | 0.00002  | 2.83 | 0.00003  | 7.46 | 0.000023 | RD20 (RESPONSIVE TO DESSICATION 20); calcium ion binding                                                                                                                                                 |
| 255795.at | AT2G33390 | 4.19 | 7.46  | 0.00002  | 2.84 | 0.00002  | 3.73 | 0.00002  | SEC14 cytosolic factor, putative / phosphatidylinositol transferase protein, putative                                                                                                                    |
| 281116.at | AT1G15370 | 4.19 | 4.92  | 0.00002  | 3.73 | 0.00002  | 4.29 | 0.00002  | similar to unknown protein [Arabidopsis thaliana] (TAIRAT1G11700.1); similar to unnamed protein product [Vitis vinifera] (GB:CAO11934.1); contains 1 zinc finger (C3HC4-type RING finger) family protein |
| 248428.at | AT1G61830 | 4.19 | 4.92  | 0.00002  | 2.84 | 0.00002  | 4.29 | 0.00002  | ATBAG2 (ARABIDOPSIS THALIANA BCL-2-ASSOCIATED ATHANOGENE 2)                                                                                                                                              |
| 245485.at | AT4G16230 | 4.09 | 5.28  | 0.000389 | 2.30 | 0.001832 | 5.66 | 0.000078 | GDSL-motif lipase/hydrolase family protein                                                                                                                                                               |
| 247461.at | AT5G62100 | 4.09 | 3.73  | 0.00002  | 4.59 | 0.00002  | 4.00 | 0.00002  | HAT2 (ARABIDOPSIS THALIANA BCL-2-ASSOCIATED ATHANOGENE 2)                                                                                                                                                |
| 248801.at | AT5G47370 | 4.09 | 4.59  | 0.00002  | 3.48 | 0.00002  | 4.29 | 0.00002  | antyrin repeat family protein                                                                                                                                                                            |
| 250201.at | AT5G14230 | 4.09 | 5.28  | 0.00002  | 2.83 | 0.00002  | 4.59 | 0.00002  | similar to unknown protein [Arabidopsis thaliana] (TAIRAT2G27090.1); similar to unnamed protein product [Vitis vinifera] (GB:CAO49895.1); contains 1 zinc finger (C3HC4-type RING finger) family protein |
| 252695.at | AT4G39790 | 4.09 | 6.50  | 0.000066 | 3.48 | 0.000774 | 3.03 | 0.000066 | microtubule-associated protein-related                                                                                                                                                                   |
| 252944.at | AT4G38320 | 4.09 | 4.59  | 0.00002  | 4.00 | 0.00002  | 3.73 | 0.00002  | CYCD5.1 (CYCLIN D5.1); cyclin-dependent protein kinase                                                                                                                                                   |
| 253055.at | AT4G37630 | 4.09 | 4.29  | 0.00002  | 4.00 | 0.00002  | 4.00 | 0.00002  | ACS7 (1-Amino-cyclopropane-1-carboxylate synthase 7); 1-aminocyclopropane-1-carboxylate synthase                                                                                                         |
| 253999.at | AT4G28200 | 4.09 | 4.92  | 0.000088 | 2.64 | 0.00002  | 5.28 | 0.00002  | 28.5 kDa class P-related heat shock protein (HSP28.5-P)                                                                                                                                                  |
| 254384.at | AT4G21870 | 4.09 | 4.29  | 0.00002  | 3.25 | 0.00002  | 4.92 | 0.00002  | E12A11; phosphatidylethanolamine binding                                                                                                                                                                 |
| 256073.at | AT1G18100 | 4.09 | 9.19  | 0.000027 | 1.32 | 0.001486 | 5.66 | 0.00002  | GDSL-motif lipase, putative                                                                                                                                                                              |
| 254949.at | AT1G31550 | 4.09 | 5.28  | 0.00002  | 3.48 | 0.00002  | 3.73 | 0.00002  | galactosyltransferase family protein                                                                                                                                                                     |
| 257560.at | AT3G14960 | 4.09 | 3.73  | 0.00002  | 3.73 | 0.00002  | 4.92 | 0.00002  | leucine-rich repeat transmembrane protein kinase, putative                                                                                                                                               |
| 258684.at | AT3G08680 | 4.09 | 5.28  | 0.00002  | 3.48 | 0.00002  | 3.73 | 0.00002  | NHL2 (NDR1/HN1-like 2)                                                                                                                                                                                   |
| 259071.at | AT3G11650 | 4.09 | 3.73  | 0.00002  | 3.73 | 0.00002  | 4.92 | 0.00002  | C2 domain-containing protein                                                                                                                                                                             |
| 259222.at | AT3G03880 | 4.09 | 4.59  | 0.00002  | 3.73 | 0.00002  | 4.00 | 0.00002  | ZOP37                                                                                                                                                                                                    |
| 262072.at | AT1G59590 | 4.09 | 2.83  | 0.00002  | 3.48 | 0.00002  | 6.96 | 0.00002  | ATP2F-AB (Phloem protein 2-AB); transmembrane receptor                                                                                                                                                   |
| 248979.at | AT5G46080 | 4.00 | 4.73  | 0.000027 | 4.29 | 0.000044 | 6.96 | 0.000023 | Tol-interleukin-18 resistance (TIR) domain-containing protein                                                                                                                                            |
| 254691.at | AT5G45220 | 4.00 | 2.83  | 0.000027 | 3.25 | 0.000101 | 4.00 | 0.000024 | exostosin family protein                                                                                                                                                                                 |
| 251594.at | AT3G57630 | 4.00 | 4.59  | 0.00002  | 3.25 | 0.00002  | 4.29 | 0.00002  | SOL1 (TSO1-Like); transcription factor                                                                                                                                                                   |
| 258326.at | AT3G22760 | 4.00 | 4.59  | 0.00002  | 3.48 | 0.00002  | 4.00 | 0.000068 | CPK9 (CBL-INTERACTING PROTEIN KINASE 9); kinase                                                                                                                                                          |
| 261581.at | AT1G01140 | 4.00 | 3.48  | 0.00002  | 4.00 | 0.00002  | 4.59 | 0.00002  | nucleosporin family protein                                                                                                                                                                              |
| 262124.at | AT1G09660 | 4.00 | 4.00  | 0.000492 | 3.25 | 0.000088 | 4.92 | 0.000035 | TUA1 (ALPHA-1/TUBULIN)                                                                                                                                                                                   |
| 252855.at | AT1G64740 | 4.00 | 3.48  | 0.00002  | 3.73 | 0.00002  | 4.92 | 0.00002  | ATPSK5 (PHYTOSULFONINE 5 PRECURSOR); growth factor                                                                                                                                                       |
| 247109.at | AT5G56570 | 3.91 | 4.00  | 0.00002  | 4.29 | 0.00002  | 4.29 | 0.00002  | JAA1/JAZ10/TFY9 (JASMONATE-ZIM-DOMAIN PROTEIN 10)                                                                                                                                                        |
| 250929.at | AT5G13220 | 3.91 | 3.25  | 0.000046 | 2.46 | 0.000189 | 7.46 | 0.00002  | IAA29 (indoleacetic acid-induced protein 29); transcription factor                                                                                                                                       |
| 253423.at | AT4G32280 | 3.91 | 3.25  | 0.00002  | 2.84 | 0.00002  | 4.00 | 0.000035 | unknown protein                                                                                                                                                                                          |
| 253827.at | AT4G28085 | 3.91 | 4.59  | 0.00002  | 2.14 | 0.00002  | 6.06 | 0.00002  | cinnamoyl-CoA reductase                                                                                                                                                                                  |
| 259975.at | AT1G76470 | 3.91 | 6.06  | 0.000023 | 2.00 | 0.000046 | 4.92 | 0.00002  | similar to unknown protein [Arabidopsis thaliana] (TAIRAT5G18720.1); similar to unknown [Populus trichocarpa] (GB:ABK92464.1); similar to Osdg02                                                         |
| 260182.at | AT1G10750 | 3.91 | 4.00  | 0.000027 | 3.48 | 0.000023 | 4.29 | 0.00002  | similar to unknown protein [Arabidopsis thaliana] (TAIRAT3G18560.1); similar to hypothetical protein [Vitis vinifera] (GB:CAN78728.1); similar to unkn                                                   |
| 260754.at | AT1G49000 | 3.91 | 4.00  | 0.00002  | 2.46 | 0.00002  | 3.73 | 0.00002  | calcium-dependent protein kinase, putative / GDP, putative                                                                                                                                               |
| 245136.at | AT2G45210 | 3.91 | 4.29  | 0.00002  | 4.00 | 0.00002  | 3.48 | 0.00002  | transferase family protein                                                                                                                                                                               |
| 261605.at | AT1G49580 | 3.91 | 4.29  | 0.00002  | 4.00 | 0.00002  | 3.48 | 0.00002  | transferase family protein                                                                                                                                                                               |
| 249494.at | AT5G39050 | 3.82 | 2.46  | 0.001486 | 3.48 | 0.000966 | 6.50 | 0.00002  | CYCD3.3 (CYCLIN D3.3); cyclin-dependent protein kinase                                                                                                                                                   |
| 252189.at | AT3G50070 | 3.82 | 4.00  | 0.00002  | 3.25 | 0.00002  | 4.29 | 0.00002  | FAM1 (FERULATE-5-HYDROXYLASE 1); ferulate 5-hydroxylase                                                                                                                                                  |
| 253088.at | AT4G36220 | 3.82 | 3.48  | 0.00002  | 3.73 | 0.00002  | 4.29 | 0.00002  | ADL (ASPARTATE OXIDASE L)-aspartate oxidase                                                                                                                                                              |
| 259197.at | AT3G29970 | 3.82 | 2.14  | 0.003355 | 4.00 | 0.00011  | 5.66 | 0.001336 | ABL4 (ABL INTERACTOR-LIKE PROTEIN 4)                                                                                                                                                                     |
| 259986.at | AT1G68120 | 3.82 | 14.93 | 0.000307 | 1.74 | 0.001486 | 2.14 | 0.003355 | SOPL48 (serine carboxypeptidase-like 48); serine carboxypeptidase                                                                                                                                        |
| 260924.at | AT1G21590 | 3.82 | 4.59  | 0.00002  | 3.25 | 0.00002  | 3.73 | 0.00002  | RH3AB (RING-H2 finger A3B); protein binding / zinc ion binding                                                                                                                                           |
| 266637.at | AT2G35600 | 3.82 | 13.00 | 0.000438 | 1.87 | 0.000389 | 2.30 | 0.00002  | ENP (ENHANCER OF PINOID); signal transducer                                                                                                                                                              |
| 267498.at | AT2G45720 | 3.82 | 4.59  | 0.00002  | 3.25 | 0.00002  | 3.73 | 0.00002  | armadillo/beta-catenin repeat family protein                                                                                                                                                             |
| 245099.at | AT2G23000 | 3.82 | 4.92  | 0.000078 | 2.83 | 0.000027 | 4.00 | 0.000189 | leucine-rich repeat transmembrane protein kinase, putative                                                                                                                                               |
| 246597.at | AT5G14760 | 3.82 | 4.59  | 0.00002  | 2.84 | 0.00002  | 3.73 | 0.00002  | ADL (ASPARTATE OXIDASE L)-aspartate oxidase                                                                                                                                                              |
| 248231.at | AT5G42030 | 3.82 | 4.59  | 0.00002  | 3.48 | 0.00002  | 3.48 | 0.00002  | RH3AB (RING-H2 finger A3B); protein binding / zinc ion binding                                                                                                                                           |
| 252806.at | AT3G45010 | 3.82 | 4.00  | 0.00002  | 3.73 | 0.00002  | 3.73 | 0.00002  | ENP (ENHANCER OF PINOID); signal transducer                                                                                                                                                              |
| 253140.at | AT4G35480 | 3.82 | 4.00  | 0.00002  | 2.83 | 0.00002  | 4.92 | 0.00002  | adenylyl sulfate kinase, putative                                                                                                                                                                        |
| 253493.at | AT4G31820 | 3.82 | 3.03  | 0.000023 | 3.25 | 0.00002  | 5.66 | 0.00002  | adenylyl sulfate kinase, putative                                                                                                                                                                        |
| 254706.at | AT4G17950 | 3.82 | 4.29  | 0.00002  | 3.73 | 0.00002  | 3.48 | 0.00002  | AP2 domain-containing transcription factor, putative                                                                                                                                                     |
| 261471.at | AT1G14460 | 3.82 | 4.00  | 0.00002  | 4.00 | 0.00002  | 3.48 | 0.000046 | DNA polymerase-related                                                                                                                                                                                   |
| 266187.at | AT2G58970 | 3.82 | 4.59  | 0.00002  | 3.73 | 0.00002  | 3.25 | 0.00002  | zinc finger (C3HC4-type RING finger) family protein                                                                                                                                                      |
| 267425.at | AT2G34810 | 3.82 | 3.25  | 0.00002  | 4.29 | 0.00002  | 4.00 | 0.00002  | FAD-binding domain-containing protein                                                                                                                                                                    |
| 247005.at | AT5G67520 | 3.73 | 3.73  | 0.000167 | 4.00 | 0.000052 | 3.48 | 0.000088 | adenylyl sulfate kinase, putative                                                                                                                                                                        |
| 247041.at | AT5G67180 | 3.73 | 4.00  | 0.000023 | 4.00 | 0.00002  | 3.25 | 0.000048 | AP2 domain-containing transcription factor, putative                                                                                                                                                     |
| 247352.at | AT5G63850 | 3.73 | 4.29  | 0.00002  | 2.14 | 0.00002  | 4.59 | 0.00002  | SNRK2.5/SRKN2.5/SRK2 (SNF1-RELATED PROTEIN KINASE 2.5); kinase                                                                                                                                           |
| 253554.at | AT4G30940 | 3.73 | 2.64  | 0.000114 | 2.83 | 0.000114 | 5.66 | 0.00003  | potassium channel tetramerization domain-containing protein                                                                                                                                              |
| 253796.at | AT4G26460 | 3.73 | 3.65  | 0.000101 | 2.14 | 0.00003  | 9.19 | 0.00002  | unknown protein                                                                                                                                                                                          |
| 254015.at | AT4G26140 | 3.73 | 5.28  | 0.00002  | 2.83 | 0.00002  | 3.48 | 0.00002  | BGAL12 (beta-galactosidase 12); beta-galactosidase                                                                                                                                                       |
| 258037.at | AT3G21230 | 3.73 | 4.29  | 0.00002  | 3.03 | 0.00002  | 4.00 | 0.00002  | 4CL5 (4-COUMARATE-COA LIGASE 5); 4-coumarate-CoA ligase                                                                                                                                                  |
| 260068.at | AT1G73805 | 3.73 | 2.00  | 0.00002  | 4.00 | 0.00003  | 6.50 | 0.00002  | calmodulin binding                                                                                                                                                                                       |
| 262181.at | AT1G78090 | 3.73 | 4.59  | 0.00002  | 3.48 | 0.00002  | 3.25 | 0.00002  | glycosyl hydrolase family 3 protein                                                                                                                                                                      |
| 262999.at | AT1G15100 | 3.73 | 4.59  | 0.00002  | 3.48 | 0.00002  | 3.25 | 0.00002  | RH2A (RING-H2 finger A2A); protein binding / zinc ion binding                                                                                                                                            |
| 265983.at | AT2G24260 | 3.73 | 4.8   | 0.00002  | 3.48 | 0.00002  | 3.48 | 0.00002  | basic helix-loop-helix (bHLH) family protein                                                                                                                                                             |
| 250302.at | AT5G11820 | 3.73 | 4.00  | 0.000101 | 2.46 | 0.000052 | 5.28 | 0.00004  | ATOWNIV6 (6-81-FRUITAN EXOHYDROLASE); hydrolase, hydrolyzing O'-glycosyl compounds / inulinase / levanase                                                                                                |
| 251683.at | AT3G57120 | 3.73 | 3.73  | 0.00002  | 2.83 | 0.00002  | 4.92 | 0.00002  | protein kinase family protein                                                                                                                                                                            |
| 254594.at | AT4G18930 | 3.65 | 4.29  | 0.00002  | 3.48 | 0.00002  | 3.25 | 0.00002  | cyclic phosphodiesterase                                                                                                                                                                                 |
| 262983.at | AT1G15110 | 3.65 | 4.29  | 0.00002  | 3.48 | 0.00002  | 3.25 | 0.00002  | phosphatidyl serine synthase family protein                                                                                                                                                              |
| 246922.at | AT5G25110 | 3.65 | 3.03  | 0.00002  | 4.29 | 0.00002  | 3.73 | 0.00002  | CPK25 (CBL-INTERACTING PROTEIN KINASE 25); kinase                                                                                                                                                        |
| 249092.at | AT5G43710 | 3.65 | 3.48  | 0.00002  | 3.73 | 0.00002  | 3.73 | 0.00002  | glycosyl hydrolase family 47 protein                                                                                                                                                                     |
| 249115.at | AT5G43810 | 3.65 | 3.73  | 0.00002  | 3.25 | 0.00002  | 4.00 | 0.00002  | ZLL (ZWILLE)                                                                                                                                                                                             |
| 253779.at | AT4G28490 | 3.65 | 4.29  | 0.00002  | 2.14 | 0.000078 | 5.28 | 0.00002  | HAESA (RECEPTOR-LIKE PROTEIN KINASE 5); ATP binding / kinase / protein serine/threonine kinase                                                                                                           |
| 258078.at | AT3G25870 | 3.65 | 4.59  | 0.00002  | 3.73 | 0.000023 | 2.83 | 0.00002  | similar to unknown protein [Arabidopsis thaliana] (TAIRAT1G13360.1); similar to unknown [Populus trichocarpa] (GB:ABK92948.1)                                                                            |
| 258107.at | AT3G23560 | 3.65 | 3.73  | 0.000088 | 2.83 | 0.00002  | 4.59 | 0.00002  | ALF5 (ABERRANT LATERAL ROOT FORMATION 5); antiporter / transporter                                                                                                                                       |
| 259329.at | AT3G26320 | 3.65 | 4.00  | 0.00002  | 3.73 | 0.00006  | 3.25 | 0.00002  | similar to unnamed protein product [Vitis vinifera] (GB:CAO44440.1)                                                                                                                                      |
| 260529.at | AT4G17260 | 3.65 | 3.73  | 0.00002  | 2.83 | 0.00002  | 4.29 | 0.00002  | WRKY2 (WRKY DNA-binding protein 23); transcription factor                                                                                                                                                |
| 264019.at | AT2G21130 | 3.65 | 3.73  | 0.00002  | 3.03 | 0.00002  | 4.29 | 0.00002  | pepsidyl-prolyl cis-trans isomerase / cyclophilin (CYP2) / rotamase                                                                                                                                      |
| 248558.at | AT5G49990 | 3.56 | 4.59  | 0.00002  | 3.25 | 0.00002  | 3.03 | 0.000114 | xanthine/uracil permease family protein                                                                                                                                                                  |
| 252557.at | AT3G45960 | 3.56 | 5.66  | 0.000027 | 2.14 | 0.00006  | 3.73 | 0.000389 | ATEXLA3 (ARABIDOPSIS THALIANA EXPANSIN-LIKE A3)                                                                                                                                                          |
| 253815.at | AT4G28250 | 3.56 | 4.59  | 0.00002  | 4.00 | 0.00002  | 2.46 | 0.00002  | ATEXPB3 (ARABIDOPSIS THALIANA EXPANSIN B3)                                                                                                                                                               |
| 261400.at | AT1G79830 | 3.56 | 4.00  | 0.00002  | 3.25 | 0.00002  | 3.48 | 0.00002  | protein phosphatase 2C family protein / PP2C family protein                                                                                                                                              |
| 262782.at | AT1G13195 | 3.56 | 3.48  | 0.00002  | 3.03 | 0.00005  | 4.29 | 0.00004  | zinc finger (C3HC4-type RING finger)                                                                                                                                                                     |

|           |           |      |      |          |      |          |       |          |                                                                                                                                                      |
|-----------|-----------|------|------|----------|------|----------|-------|----------|------------------------------------------------------------------------------------------------------------------------------------------------------|
| 287305.at | AT2G30070 | 3.17 | 3.48 | 0.00002  | 2.83 | 0.00002  | 3.25  | 0.00002  | ATKT1 (Arabidopsis thaliana K <sup>+</sup> uptake 1); potassium ion transmembrane transporter                                                        |
| 287411.at | AT2G34930 | 3.17 | 4.29 | 0.00002  | 3.25 | 0.00003  | 3.70  | 0.00002  | disease resistance family protein                                                                                                                    |
| 287473.at | AT2G47520 | 3.10 | 2.64 | 0.00014  | 3.03 | 0.00003  | 3.30  | 0.00002  | AP2 domain-containing transcription factor, putative                                                                                                 |
| 287495.at | AT2G28410 | 3.10 | 3.25 | 0.00002  | 2.83 | 0.00002  | 3.25  | 0.00002  | UBI1 (UBUSTIN-COMJUGATING ENZYME 17); ubiquitin-protein ligase                                                                                       |
| 288225.at | AT5G47130 | 3.10 | 3.48 | 0.00017  | 2.14 | 0.00013  | 4.00  | 0.00002  | Bax inhibitor-1 family / BH-1 family                                                                                                                 |
| 249618.at | AT5G37490 | 3.10 | 2.46 | 0.000692 | 2.46 | 0.00249  | 4.92  | 0.00002  | U-box domain-containing protein                                                                                                                      |
| 253378.at | AT4G33310 | 3.10 | 2.64 | 0.000618 | 5.28 | 0.00304  | 2.14  | 0.00189  | unknown protein                                                                                                                                      |
| 259252.at | AT1G12570 | 3.10 | 4.59 | 0.000214 | 2.46 | 0.000035 | 2.64  | 0.000389 | glucose-methanol-choline (GMC) oxidoreductase family protein                                                                                         |
| 261296.at | AT1G28770 | 3.10 | 3.25 | 0.00002  | 3.03 | 0.00002  | 3.03  | 0.00002  | ATEXP10 (ARABIDOPSIS THALIANA EXPANSIN A10)                                                                                                          |
| 262225.at | AT1G28990 | 3.10 | 3.64 | 0.000023 | 3.48 | 0.000023 | 3.48  | 0.000023 | similar to unnamed protein product [Vitis vinifera] (GB:CA065660.1); contains InterPro domain Methyltransferase F4M (InterPro:IPR006342)             |
| 264385.at | AT1G12020 | 3.10 | 2.74 | 0.00002  | 2.46 | 0.00002  | 3.25  | 0.00002  | similar to unnamed protein product [Vitis vinifera] (GB:CA065660.1); contains InterPro domain Methyltransferase F4M (InterPro:IPR006342)             |
| 264588.at | AT2G17730 | 3.10 | 2.83 | 0.000068 | 2.46 | 0.000035 | 4.29  | 0.00003  | zinc finger (C2HC4-type RING finger) family protein                                                                                                  |
| 264824.at | AT1G03420 | 3.10 | 3.25 | 0.00002  | 3.25 | 0.00002  | 2.83  | 0.00008  | transposable element gene                                                                                                                            |
| 265993.at | AT2G24160 | 3.10 | 4.29 | 0.000035 | 2.46 | 0.000088 | 2.83  | 0.00002  | pseudogene, leucine rich repeat protein family, contains leucine rich repeat domains Pfam-PF0560, InterPro:IPR001611; contains some similarity t     |
| 267676.at | AT2G26680 | 3.10 | 3.73 | 0.00002  | 3.03 | 0.00002  | 2.64  | 0.00002  | similar to unnamed protein product [Vitis vinifera] (GB:CA065660.1); contains InterPro domain Methyltransferase F4M (InterPro:IPR006342)             |
| 246268.at | AT1G31850 | 3.03 | 3.73 | 0.00002  | 2.46 | 0.00002  | 3.03  | 0.00002  | dehydration-responsive protein, putative                                                                                                             |
| 247048.at | AT5G66440 | 3.03 | 3.03 | 0.00002  | 3.03 | 0.000027 | 3.03  | 0.000023 | similar to unnamed protein [Arabidopsis thaliana] (TAIRAT4G24560.1); similar to hypothetical protein [Thellungiella halophila] (GB:ABB45849.1)       |
| 249370.at | AT5G40710 | 3.03 | 3.25 | 0.00002  | 2.83 | 0.00002  | 3.03  | 0.00002  | zinc finger (C2H2 type) family protein                                                                                                               |
| 259864.at | AT1G72800 | 3.03 | 2.83 | 0.001201 | 1.62 | 0.000147 | 6.06  | 0.000023 | nuM1-related                                                                                                                                         |
| 246498.at | AT5G16230 | 3.03 | 3.48 | 0.00002  | 2.46 | 0.000088 | 3.25  | 0.000023 | acyl-(acyl-carrier-protein) desaturase, putative / stearoyl-ACP desaturase, putative                                                                 |
| 247186.at | AT5G65470 | 3.03 | 3.48 | 0.00002  | 2.46 | 0.00002  | 3.25  | 0.00002  | similar to unnamed protein [Arabidopsis thaliana] (TAIRAT4G24530.1); similar to unnamed protein product [Vitis vinifera] (GB:CA061608.1); similar to |
| 248096.at | AT5G55490 | 3.03 | 3.48 | 0.000046 | 2.00 | 0.00161  | 4.00  | 0.001077 | ATCEX1/GE1 (GAEMTE EXPRESSED PROTEIN)                                                                                                                |
| 248295.at | AT5G53030 | 3.03 | 3.73 | 0.00023  | 2.30 | 0.00002  | 3.25  | 0.000389 | similar to unnamed protein [Arabidopsis thaliana] (TAIRAT4G227810.1); similar to hypothetical protein [Vitis vinifera] (GB:CAN71155.1)               |
| 254573.at | AT4G18420 | 3.03 | 2.30 | 0.00002  | 3.25 | 0.00002  | 3.73  | 0.00002  | pectinacetylesterase family protein                                                                                                                  |
| 260364.at | AT1G70560 | 3.03 | 3.73 | 0.00002  | 3.03 | 0.00002  | 2.46  | 0.00002  | allinase C-terminal domain-containing protein                                                                                                        |
| 261804.at | AT1G30530 | 3.03 | 4.00 | 0.00002  | 2.64 | 0.00002  | 2.64  | 0.00002  | UDP-glucuronosyl/UDP-glucosyl transferase family protein                                                                                             |
| 263482.at | AT2G03980 | 3.03 | 2.83 | 0.00002  | 3.03 | 0.00002  | 3.25  | 0.00002  | GDSL-motif lipase/hydrolase family protein                                                                                                           |
| 263967.at | AT2G36270 | 3.03 | 3.25 | 0.000042 | 2.30 | 0.000025 | 3.73  | 0.00003  | ABS (ABA INSENSITIVE 5); DNA binding / transcription activator / transcription factor                                                                |
| 264222.at | AT4G28900 | 2.96 | 2.64 | 0.000438 | 3.03 | 0.000088 | 3.03  | 0.00002  | RAP210 (related to AP2 10); DNA binding / transcription factor                                                                                       |
| 246911.at | AT2G58510 | 2.96 | 3.03 | 0.00002  | 3.73 | 0.00002  | 2.30  | 0.000035 | TNY (TNY); DNA binding / transcription factor                                                                                                        |
| 251722.at | AT3G58200 | 2.96 | 3.25 | 0.00002  | 2.30 | 0.000114 | 3.48  | 0.00002  | amino acid transporter family protein                                                                                                                |
| 252991.at | AT4G38470 | 2.96 | 2.46 | 0.00002  | 2.64 | 0.00002  | 4.00  | 0.00002  | protein kinase family protein                                                                                                                        |
| 253732.at | AT4G29140 | 2.96 | 3.03 | 0.00002  | 2.83 | 0.00002  | 3.03  | 0.00002  | MATE efflux protein-related                                                                                                                          |
| 254704.at | AT4G18020 | 2.96 | 3.73 | 0.000068 | 2.46 | 0.000035 | 2.83  | 0.000013 | APRR2 (IPSEUDO-RESPONSE REGULATOR 2); transcription factor                                                                                           |
| 257610.at | AT3G12810 | 2.96 | 2.83 | 0.00002  | 2.03 | 0.00002  | 3.03  | 0.00002  | ATDD11 (ARABIDOPSIS THALIANA INDETERMINATE11); nucleic acid binding / transcription factor / zinc ion binding                                        |
| 257636.at | AT3G26200 | 2.96 | 1.74 | 0.000966 | 2.14 | 0.000307 | 6.96  | 0.000101 | CYP71B22 (cytochrome P450, family 71, subfamily B, polypeptide 22); oxygen binding                                                                   |
| 258998.at | AT3G01820 | 2.96 | 2.83 | 0.00002  | 3.03 | 0.00002  | 3.03  | 0.00002  | adenylate kinase family protein                                                                                                                      |
| 259109.at | AT3G05880 | 2.96 | 3.48 | 0.000273 | 2.46 | 0.000088 | 3.03  | 0.000307 | serine/threonine protein phosphatase, putative                                                                                                       |
| 262105.at | AT1G02810 | 2.96 | 3.25 | 0.00002  | 2.30 | 0.00002  | 3.48  | 0.00002  | pectinesterase family protein                                                                                                                        |
| 263953.at | AT3G26050 | 2.96 | 2.46 | 0.000147 | 2.46 | 0.000241 | 4.29  | 0.00003  | ATOPF3 (OPF3) (Arabidopsis thaliana ovate family protein 15)                                                                                         |
| 264033.at | AT1G28960 | 2.96 | 4.29 | 0.00002  | 2.46 | 0.000025 | 2.96  | 0.000088 | zinc finger (C2HC4-type RING finger) family protein                                                                                                  |
| 264358.at | AT2G32280 | 2.96 | 3.25 | 0.00002  | 2.46 | 0.00002  | 3.25  | 0.00004  | similar to unnamed protein [Arabidopsis thaliana] (TAIRAT4G221310.1); similar to unknown [Populus trichocarpa] (GB:ABX92874.1); contains InterPro c  |
| 266761.at | AT2G47130 | 2.96 | 2.83 | 0.00002  | 2.30 | 0.00002  | 4.00  | 0.00002  | short-chain dehydrogenase/reductase (SDR) family protein                                                                                             |
| 267339.at | AT2G39870 | 2.96 | 2.83 | 0.00002  | 3.25 | 0.00002  | 2.83  | 0.00002  | similar to unnamed protein [Arabidopsis thaliana] (TAIRAT3G55690.1); similar to unnamed protein product [Vitis vinifera] (GB:CA069095.1)             |
| 259904.at | AT1G74150 | 2.96 | 2.64 | 0.000273 | 3.25 | 0.000046 | 3.03  | 0.000068 | similar to unnamed protein [Arabidopsis thaliana] (TAIRAT3G55690.1); similar to unnamed protein product [Vitis vinifera] (GB:CA069095.1)             |
| 266778.at | AT2G26090 | 2.96 | 3.03 | 0.00002  | 3.25 | 0.000078 | 2.64  | 0.000101 | CYP707A2 (cytochrome P450, family 707, subfamily A, polypeptide 2); oxygen binding                                                                   |
| 257105.at | AT3G15300 | 2.96 | 4.29 | 0.00002  | 2.46 | 0.000035 | 2.96  | 0.000068 | VQ motif-containing protein                                                                                                                          |
| 258700.at | AT3G09710 | 2.89 | 4.29 | 0.000046 | 2.46 | 0.000114 | 2.30  | 0.000052 | IQD1 (IQ-DOMAIN 1); calmodulin binding                                                                                                               |
| 245965.at | AT5G19730 | 2.89 | 4.29 | 0.00002  | 3.25 | 0.00002  | 1.74  | 0.00013  | pectinesterase family protein                                                                                                                        |
| 246932.at | AT5G25190 | 2.89 | 3.25 | 0.00003  | 2.64 | 0.000167 | 2.83  | 0.000101 | ethylene-responsive element-binding protein, putative                                                                                                |
| 246953.at | AT5G04850 | 2.89 | 3.03 | 0.00002  | 2.83 | 0.00002  | 2.83  | 0.00002  | VPS80.2                                                                                                                                              |
| 247178.at | AT5G65890 | 2.89 | 2.46 | 0.000078 | 2.83 | 0.00002  | 2.46  | 0.000101 | AGR1 (ACT DOMAIN REPEAT 1)                                                                                                                           |
| 247705.at | AT5G09550 | 2.89 | 2.46 | 0.00002  | 2.30 | 0.00002  | 3.48  | 0.00002  | zinc finger (C2HC4-type RING finger) family protein                                                                                                  |
| 250277.at | AT5G12940 | 2.89 | 3.73 | 0.00002  | 2.46 | 0.00002  | 2.64  | 0.000088 | leucine-rich repeat family protein                                                                                                                   |
| 253670.at | AT4G29610 | 2.89 | 4.59 | 0.00002  | 2.64 | 0.000214 | 2.00  | 0.000202 | cytidine deaminase, putative / cytidine aminohydrolase, putative                                                                                     |
| 254562.at | AT4G19230 | 2.89 | 3.25 | 0.00002  | 2.46 | 0.00002  | 3.03  | 0.00002  | CYP707A1 (cytochrome P450, family 707, subfamily A, polypeptide 1); oxygen binding                                                                   |
| 254821.at | AT4G18800 | 2.89 | 3.25 | 0.00003  | 2.83 | 0.00002  | 2.64  | 0.00002  | WAP5 (WASP) (WISSKOTT-ALDRICH SYNDROME PROTEIN) FAMILY VERPULFON HOMOLOGOUS PROTEIN 5)                                                               |
| 259042.at | AT3G21310 | 2.89 | 3.73 | 0.00006  | 2.46 | 0.000035 | 2.64  | 0.00004  | similar to unnamed protein [Arabidopsis thaliana] (TAIRAT1G51770.1); similar to unnamed protein product [Vitis vinifera] (GB:CA045744.1); contains 1 |
| 258145.at | AT3G18200 | 2.89 | 3.25 | 0.00002  | 2.83 | 0.00002  | 2.46  | 0.00002  | roadin (RD1) family protein                                                                                                                          |
| 263325.at | AT2G04240 | 2.89 | 2.83 | 0.00002  | 2.83 | 0.00002  | 3.03  | 0.00002  | XERD1; protein binding / zinc ion binding                                                                                                            |
| 267037.at | AT2G38320 | 2.89 | 2.46 | 0.00002  | 3.73 | 0.001201 | 2.64  | 0.00003  | similar to unnamed protein [Arabidopsis thaliana] (TAIRAT5G01620.2); similar to unnamed protein [Arabidopsis thaliana] (TAIRAT5G01620.1); similar t  |
| 267423.at | AT2G35060 | 2.89 | 2.64 | 0.00002  | 2.64 | 0.00002  | 3.48  | 0.00002  | KUP11 (K <sup>+</sup> uptake permease 11); potassium ion transmembrane transporter                                                                   |
| 248881.at | AT5G48900 | 2.83 | 3.03 | 0.00002  | 2.30 | 0.00002  | 3.25  | 0.00002  | pectate lyase family protein                                                                                                                         |
| 248808.at | AT5G47510 | 2.83 | 9.19 | 0.00002  | 1.52 | 0.001832 | 1.062 | 0.002733 | SEC14 cytosolic factor family protein / phosphoglycerate transfer family protein                                                                     |
| 248921.at | AT5G47070 | 2.83 | 2.83 | 0.00002  | 2.30 | 0.00002  | 2.96  | 0.00002  | protein kinase, putative                                                                                                                             |
| 249043.at | AT5G41140 | 2.83 | 2.64 | 0.00002  | 2.83 | 0.00002  | 2.83  | 0.00003  | similar to unnamed protein [Arabidopsis thaliana] (TAIRAT1G63300.1); similar to unnamed protein product [Vitis vinifera] (GB:CA062788.1); contains i |
| 253084.at | AT4G36260 | 2.83 | 2.00 | 0.000273 | 2.46 | 0.003355 | 4.92  | 0.000088 | STY2 (STYLISH 2)                                                                                                                                     |
| 253562.at | AT4G31130 | 2.83 | 3.03 | 0.00002  | 2.30 | 0.00002  | 3.25  | 0.00002  | similar to hypothetical protein [Vitis vinifera] (GB:CAN84246.1); contains InterPro domain Protein of unknown function DUF1218 (InterPro:IPR090086)  |
| 255538.at | AT4G01880 | 2.83 | 3.03 | 0.00002  | 2.64 | 0.00002  | 2.83  | 0.00002  | MYB55 (myb domain protein 55); DNA binding / transcription factor                                                                                    |
| 255783.at | AT1G16730 | 2.83 | 4.29 | 0.000068 | 1.87 | 0.001486 | 2.83  | 0.000241 | similar to unknown [Picea sitchensis] (GB:ABX21208.1)                                                                                                |
| 257137.at | AT1G62890 | 2.83 | 2.64 | 0.00002  | 2.64 | 0.00002  | 3.25  | 0.00002  | ATMDR11 (ATPG18/MDR1/MDR11); PGP19 (P-GLYCOPROTEIN 19); ATPase, coupled to transmembrane movement of substances / auxin efflux tr                    |
| 258366.at | AT2G14230 | 2.83 | 2.64 | 0.00002  | 2.64 | 0.00002  | 2.64  | 0.00002  | RAP210 (related to AP2 10); DNA binding / transcription factor                                                                                       |
| 259737.at | AT1G64400 | 2.83 | 2.64 | 0.00002  | 2.30 | 0.00002  | 3.73  | 0.00002  | long-chain-fatty-acyl-CoA ligase, putative / long-chain acyl-CoA synthetase, putative                                                                |
| 260167.at | AT1G71970 | 2.83 | 3.03 | 0.00002  | 2.30 | 0.00002  | 3.25  | 0.00002  | similar to unnamed protein [Arabidopsis thaliana] (TAIRAT1G22880.1); similar to unknown [Populus trichocarpa] (GB:ABX84468.1)                        |
| 263959.at | AT2G01890 | 2.83 | 2.46 | 0.00002  | 3.03 | 0.00002  | 3.03  | 0.00002  | PAP8 (PURPLE ACID PHOSPHATASE PRECURSOR); acid phosphatase / protein serine/threonine phosphatase                                                    |
| 263920.at | AT2G36410 | 2.83 | 2.46 | 0.00002  | 2.46 | 0.00002  | 3.25  | 0.00002  | similar to unnamed protein [Arabidopsis thaliana] (TAIRAT3G5920.1); similar to unknown [Populus trichocarpa] (GB:ABX83998.1); contains InterPro c    |
| 265117.at | AT1G62500 | 2.83 | 3.25 | 0.00002  | 2.83 | 0.00002  | 2.83  | 0.00002  | protease inhibitor/seed storage/lipid transfer protein (LTP) family protein                                                                          |
| 265385.at | AT2G20900 | 2.83 | 3.25 | 0.00002  | 2.30 | 0.00002  | 2.96  | 0.00002  | diacylglycerol kinase, putative                                                                                                                      |
| 266322.at | AT2C46690 | 2.83 | 2.83 | 0.00002  | 3.48 | 0.00002  | 2.30  | 0.00002  | auxin-responsive family protein                                                                                                                      |
| 266532.at | AT2G16890 | 2.83 | 3.73 | 0.00002  | 2.46 | 0.00002  | 2.46  | 0.00002  | UDP-glucuronosyl/UDP-glucosyl transferase family protein                                                                                             |
| 266802.at | AT2G22900 | 2.83 | 3.25 | 0.00002  | 2.46 | 0.00002  | 2.83  | 0.00002  | galactosyl transferase GMA12/MNN10 family protein                                                                                                    |
| 245151.at | AT2G47550 | 2.76 | 2.46 | 0.00002  | 2.64 | 0.00002  | 3.25  | 0.00002  | pectinesterase family protein                                                                                                                        |
| 245840.at | AT1G69420 | 2.76 | 2.64 | 0.00114  | 1.62 | 0.005499 | 4.92  | 0.000023 | similar to unnamed protein [Arabidopsis thaliana] (TAIRAT1G10140.1); contains InterPro domain Uncharacterised conserved protein UCP931279 (Inter     |
| 247965.at | AT5G55640 | 2.76 | 2.46 | 0.00002  | 3.48 | 0.00002  | 4.29  | 0.00002  | AGP4 (ARABIDOPSIS GELATINASE 4)                                                                                                                      |
| 248313.at | AT5G41560 | 2.76 | 3.03 | 0.00002  | 2.46 | 0.00002  | 2.83  | 0.00002  | similar to unnamed protein product [Vitis vinifera] (GB:CA069907.1)                                                                                  |
| 254796.at | AT4G13000 | 2.76 | 3.03 | 0.000865 | 2.14 | 0.000052 | 3.25  | 0.000101 | protein kinase family protein                                                                                                                        |
| 254810.at | AT4G12390 | 2.76 | 3.48 | 0.00002  | 2.46 | 0.00002  | 2.46  | 0.00002  | PME1; pectinesterase inhibitor                                                                                                                       |
| 256093.at | AT1G20923 | 2.76 | 3.73 | 0.00002  | 2.30 | 0.00002  | 2.46  | 0.000078 | zinc finger (C2HC4-type RING finger) family protein                                                                                                  |
| 262703.at | AT1G16510 | 2.76 | 3.03 | 0.000023 | 2.83 | 0.00002  | 2.46  | 0.00002  | DC1 domain-containing protein                                                                                                                        |
| 262786.at | AT1G10740 | 2.76 | 2.83 | 0.00002  | 2.14 | 0.00002  | 3.48  | 0.00002  | SNM1 (SENSITIVE TO NITROGEN MUSTARD 1)                                                                                                               |
| 263157.at | AT1G54100 | 2.76 | 2.64 | 0.00002  | 2.46 | 0.00002  | 3.25  | 0.00002  | ALDH18A (ALDEHYDE DEHYDROGENASE 78A); 3-chloroethyl aldehyde dehydrogenase                                                                           |
| 268593.at | AT2G46200 | 2.76 | 3.03 | 0.00002  | 2.00 | 0.00002  | 3.48  | 0.00002  | similar to unnamed protein product [Vitis vinifera] (GB:CA039889.1)                                                                                  |
| 268606.at | AT2G46310 | 2.76 | 2.46 | 0.00003  | 2.83 | 0.00002  | 3.03  | 0.00002  | ORF5 (CYTOKININ RESPONSE FACTOR 5); DNA binding / transcription factor                                                                               |
| 267839.at | AT2G42200 | 2.76 | 3.48 | 0.00003  | 2.30 | 0.00003  | 2.64  | 0.00013  | squamosa promoter-binding protein-like 9 (SPB9)                                                                                                      |
| 248236.at | AT5G53870 | 2.70 | 2.14 | 0.001077 | 4.29 | 0.001077 | 2.14  | 0.000346 | plastoquinone-like                                                                                                                                   |

|           |               |     |      |          |      |          |      |          |                                                                                                                                                       |
|-----------|---------------|-----|------|----------|------|----------|------|----------|-------------------------------------------------------------------------------------------------------------------------------------------------------|
| 252153.at | AT3G51360     | 258 | 3.73 | 0.00013  | 2.14 | 0.000101 | 2.14 | 0.001077 | aspartyl protease family protein                                                                                                                      |
| 252956.at | AT4G28580     | 258 | 3.48 | 0.00002  | 2.30 | 0.00002  | 2.14 | 0.000002 | ATFP6 (FARNESYLATED PROTEIN 6); metal ion binding                                                                                                     |
| 253182.at | AT4G28190     | 258 | 2.46 | 0.000035 | 1.87 | 0.000355 | 3.73 | 0.000008 | similar to unknown protein [Arabidopsis thaliana] (TAIRAT4G28190.1); similar to unnamed protein product [Vitis vinifera] (GB:CAO47480.1); contains 1  |
| 253766.at | AT3G16260     | 258 | 3.25 | 0.00002  | 2.64 | 0.00002  | 2.64 | 0.000002 | arabinoxylan inhibitor/sieve sterosyl transfer protein (LTP) family protein                                                                           |
| 253702.at | AT3G23750     | 258 | 2.46 | 0.00002  | 2.46 | 0.00002  | 2.83 | 0.000002 | leucine-rich repeat family protein / protein kinase family protein                                                                                    |
| 258357.at | AT3G14350     | 258 | 3.48 | 0.00002  | 2.46 | 0.00008  | 2.00 | 0.000002 | SRF7 (STRUBBELIG-RECEPTOR FAMILY 7); ATP binding / protein serine/threonine kinase                                                                    |
| 258921.at | AT3G10500     | 258 | 2.30 | 0.00002  | 2.00 | 0.00002  | 3.73 | 0.000002 | ANAC053 (Arabidopsis NAC domain containing protein 53); transcription factor                                                                          |
| 259967.at | AT1G76510     | 258 | 2.64 | 0.00002  | 2.30 | 0.000035 | 2.83 | 0.000002 | ARID/BRIGHT DNA-binding domain-containing protein                                                                                                     |
| 260422.at | AT1G68150     | 258 | 2.83 | 0.00003  | 2.00 | 0.00002  | 3.03 | 0.000002 | WRKY9 (WRKY DNA-binding protein 9); transcription factor                                                                                              |
| 260939.at | AT1G64880     | 258 | 2.64 | 0.00003  | 2.64 | 0.00003  | 2.83 | 0.000046 | zinc finger (C3HC4-type RING finger) family protein                                                                                                   |
| 260974.at | AT1G53440     | 258 | 2.64 | 0.00003  | 2.30 | 0.00002  | 2.83 | 0.000004 | leucine-rich repeat family protein / protein kinase family protein                                                                                    |
| 264026.at | AT2G21060     | 258 | 3.03 | 0.00002  | 2.14 | 0.00002  | 2.64 | 0.00003  | ATRP2B (GLYCINE-RICH PROTEIN 2B); nucleic acid binding                                                                                                |
| 265284.at | AT2G20230     | 258 | 2.64 | 0.00002  | 2.46 | 0.00002  | 2.64 | 0.00003  | similar to unknown protein [Arabidopsis thaliana] (TAIRAT4G28770.1); similar to unknown [Populus trichocarpa] (GB:ABK3408.1); similar to unknown      |
| 266117.at | AT2G02170     | 258 | 2.46 | 0.000035 | 2.46 | 0.00003  | 2.83 | 0.000004 | remorin family protein                                                                                                                                |
| 266167.at | AT3G28860     | 258 | 3.03 | 0.00002  | 1.62 | 0.00002  | 3.48 | 0.000002 | YL55 (yellow-leaf-specific gene 5)                                                                                                                    |
| 245229.at | AT4G31970     | 252 | 2.46 | 0.00003  | 1.62 | 0.00002  | 3.48 | 0.000003 | transposon-like repetitive DNA element                                                                                                                |
| 249770.at | AT5G24110     | 252 | 1.74 | 0.005408 | 1.87 | 0.00027  | 4.82 | 0.000002 | WRKY30 (WRKY DNA-binding protein 30); transcription factor                                                                                            |
| 249994.at | AT5G18590     | 252 | 2.46 | 0.00002  | 2.46 | 0.00002  | 2.64 | 0.000002 | kelch repeat-containing protein                                                                                                                       |
| 251009.at | AT5G02640     | 252 | 2.83 | 0.00006  | 2.46 | 0.00018  | 2.30 | 0.000273 | similar to unknown protein [Arabidopsis thaliana] (TAIRAT3G46300.1); similar to hypothetical protein [Vitis vinifera] (GB:CAN66778.1)                 |
| 251826.at | AT3G55110     | 252 | 3.03 | 0.000101 | 2.14 | 0.00006  | 2.46 | 0.000046 | ABC transporter family protein                                                                                                                        |
| 253632.at | AT4G30430     | 252 | 2.30 | 0.000492 | 3.03 | 0.000389 | 2.30 | 0.000865 | TE9 (TETRASPANIN9)                                                                                                                                    |
| 253989.at | AT4G28150     | 252 | 2.83 | 0.00002  | 2.14 | 0.00002  | 2.64 | 0.000002 | similar to unknown protein [Arabidopsis thaliana] (TAIRAT5G58900.1); similar to hypothetical protein [Vitis vinifera] (GB:CAN72576.1)                 |
| 256586.at | AT3G20180     | 252 | 2.83 | 0.00002  | 2.46 | 0.00002  | 2.30 | 0.000002 | BRX02/2 (BRASSINOSTEROID-6-OXIDASE 2); monoxygenase/ oxygen binding                                                                                   |
| 256664.at | AT3G12040     | 252 | 2.46 | 0.000035 | 2.30 | 0.00003  | 2.83 | 0.000052 | DNA-3-methyladenine glycosylase (MAG)                                                                                                                 |
| 258462.at | AT3G17350     | 252 | 3.25 | 0.00002  | 2.30 | 0.00027  | 2.14 | 0.000273 | similar to unknown protein [Arabidopsis thaliana] (TAIRAT5G50290.1); similar to unnamed protein product [Vitis vinifera] (GB:CAO70913.1); contains 1  |
| 260395.at | AT1G69780     | 252 | 2.64 | 0.00002  | 3.03 | 0.00002  | 2.00 | 0.000003 | ATH13; DNA binding / transcription factor                                                                                                             |
| 260800.at | AT1G78240     | 252 | 2.46 | 0.00006  | 2.14 | 0.00002  | 3.03 | 0.000002 | TS02 (TUMOROUS SHOOT DEVELOPMENT 2); methyltransferase                                                                                                |
| 260840.at | AT1G28090     | 252 | 3.03 | 0.00002  | 2.14 | 0.00002  | 2.46 | 0.000101 | similar to unknown protein [Arabidopsis thaliana] (TAIRAT4G28470.1); similar to unnamed protein product [Vitis vinifera] (GB:CAO48076.1); contains 1  |
| 261425.at | AT1G18920     | 252 | 2.83 | 0.00002  | 2.00 | 0.00002  | 2.64 | 0.000002 | proton-dependent oligopeptide transport (POT) family protein                                                                                          |
| 264692.at | AT1G70000     | 252 | 3.25 | 0.00002  | 2.14 | 0.00003  | 2.30 | 0.000618 | DNA-binding family protein                                                                                                                            |
| 264898.at | AT1G23205     | 252 | 3.03 | 0.00002  | 2.64 | 0.00002  | 2.00 | 0.000078 | invertase/pectin methyltransferase inhibitor family protein                                                                                           |
| 247519.at | AT5G61430     | 246 | 5.28 | 0.00023  | 1.52 | 0.004073 | 1.87 | 0.000101 | ANAC100/ATNACS (Arabidopsis NAC domain containing protein 100); transcription factor                                                                  |
| 247628.at | AT5G60400     | 246 | 2.14 | 0.00002  | 2.64 | 0.00002  | 2.64 | 0.000002 | unknown protein                                                                                                                                       |
| 249125.at | AT5G43380     | 246 | 2.64 | 0.00013  | 1.74 | 0.00048  | 3.25 | 0.000013 | TOPP6 (Type one serine/threonine protein phosphatase 6); protein serine/threonine phosphatase                                                         |
| 251010.at | AT5G25550     | 246 | 3.25 | 0.00002  | 2.14 | 0.00002  | 2.14 | 0.000002 | unknown protein                                                                                                                                       |
| 254445.at | AT4G20930     | 246 | 2.83 | 0.00002  | 3.03 | 0.00002  | 1.74 | 0.000023 | 3-hydroxyisobutyrate dehydrogenase, putative                                                                                                          |
| 258818.at | AT3G21420     | 246 | 4.29 | 0.00003  | 1.52 | 0.00088  | 2.30 | 0.000078 | oxidoreductase, 2OG-Fe(II) oxygenase family protein                                                                                                   |
| 258855.at | AT3G02070     | 246 | 2.30 | 0.00002  | 2.14 | 0.00002  | 3.03 | 0.000002 | OTU-like cysteine protease family protein                                                                                                             |
| 258868.at | AT3G03110     | 246 | 2.14 | 0.00002  | 2.64 | 0.000273 | 2.64 | 0.000052 | XPO1B (exportin 1B); protein transporter                                                                                                              |
| 259149.at | AT3G10340     | 246 | 2.64 | 0.00002  | 1.74 | 0.00048  | 3.25 | 0.000002 | phenylalanine ammonia-lyase, putative                                                                                                                 |
| 259686.at | AT1G27960     | 246 | 2.30 | 0.00002  | 2.14 | 0.00002  | 2.64 | 0.000014 | ECT3 (evolutionarily conserved C-terminal region 3)                                                                                                   |
| 260001.at | AT1G67800     | 246 | 2.83 | 0.00002  | 1.74 | 0.00027  | 2.46 | 0.000002 | similar to catalytic [Arabidopsis thaliana] (TAIRAT1G24350.1); similar to unknown [Picea sitchensis] (GB:ABK28930.1); contains InterPro domain Acid   |
| 260220.at | AT1G74650     | 246 | 2.64 | 0.000078 | 1.87 | 0.00148  | 3.03 | 0.000273 | AIMY31/AY13 (myb domain protein 31); DNA binding / transcription factor                                                                               |
| 260540.at | AT2G43500     | 246 | 2.83 | 0.00002  | 1.87 | 0.00014  | 2.83 | 0.000035 | RWP-RK domain-containing protein                                                                                                                      |
| 261114.at | IGT5390AT1G75 | 246 | 3.73 | 0.00002  | 1.87 | 0.00006  | 2.14 | 0.000002 | [AT1G7590, AT2B3P4 (ARABIDOPSIS THALIANA BASIC LEUCINE-ZIPPER 44); DNA binding / protein heterodimerization/transcription factor][A                   |
| 263419.at | AT2G17220     | 246 | 2.46 | 0.00002  | 2.00 | 0.00002  | 3.03 | 0.000002 | protein kinase family protein                                                                                                                         |
| 263775.at | AT2G6410      | 246 | 2.83 | 0.00002  | 3.03 | 0.00023  | 1.74 | 0.000014 | CP2 (GARRICE); DNA binding / transcription factor                                                                                                     |
| 267602.at | AT2S29270     | 246 | 2.14 | 0.00008  | 2.64 | 0.00002  | 2.64 | 0.000002 | similar to unnamed protein product [Vitis vinifera] (GB:CAO24057.1)                                                                                   |
| 257644.at | AT3G25780     | 246 | 2.64 | 0.00002  | 1.82 | 0.00002  | 3.48 | 0.000002 | AOC3 (ALLENE OXIDE CYCLASE 3)                                                                                                                         |
| 247569.at | AT5G81240     | 241 | 2.64 | 0.00002  | 2.14 | 0.00002  | 2.46 | 0.000002 | protein binding                                                                                                                                       |
| 247930.at | AT5G57060     | 241 | 2.14 | 0.00002  | 2.30 | 0.00002  | 2.83 | 0.000002 | similar to unknown protein [Arabidopsis thaliana] (TAIRAT4G28060.1); similar to unknown [Picea sitchensis] (GB:ABK23978.1); contains InterPro dom     |
| 251879.at | AT3G54200     | 241 | 2.30 | 0.00002  | 2.30 | 0.00003  | 2.64 | 0.000002 | similar to unknown protein [Arabidopsis thaliana] (TAIRAT3G59575.1); similar to Herpin-induced 1 [Medicago truncatula] (GB:ABE93043.1); contains 1    |
| 254503.at | AT4G19120     | 241 | 2.83 | 0.00002  | 2.14 | 0.00002  | 2.64 | 0.000002 | ERK2 (ERK1/2-RELATED KINASE 2); protein kinase                                                                                                        |
| 254791.at | AT4G12910     | 241 | 2.83 | 0.00003  | 2.14 | 0.00035  | 2.30 | 0.000002 | SCPL29 (serine carboxypeptidase-like 29); serine carboxypeptidase                                                                                     |
| 254922.at | AT4G11370     | 241 | 2.64 | 0.000046 | 1.74 | 0.00046  | 3.03 | 0.000002 | RHA1A (RING-H2 finger A1A); protein binding / zinc ion binding                                                                                        |
| 255134.at | AT4G08330     | 241 | 2.30 | 0.00027  | 2.30 | 0.00032  | 2.64 | 0.000003 | Identical to Uncharacterized protein At4G08330, chloroplast precursor [Arabidopsis Thaliana] (GB:Q5STNS); similar to peptide-methionine ('S')-S-oxide |
| 256020.at | AT1G58290     | 241 | 2.00 | 0.00002  | 1.87 | 0.00002  | 3.73 | 0.000002 | HEMA1; glutamyl-tRNA reductase                                                                                                                        |
| 259900.at | AT3G24670     | 241 | 2.46 | 0.00002  | 2.30 | 0.00002  | 2.46 | 0.000002 | pectate lyase family protein                                                                                                                          |
| 259819.at | AT3G64860     | 241 | 2.46 | 0.00002  | 1.74 | 0.00002  | 3.25 | 0.000002 | EM4 (ETHYLENE INSENSITIVE 4); receptor                                                                                                                |
| 259933.at | AT1G12530     | 241 | 2.41 | 0.00027  | 2.30 | 0.00052  | 2.80 | 0.000033 | similar to unknown protein [Arabidopsis thaliana] (TAIRAT1G56420.1); similar to OsD3g228500 [Oryza sativa (aponica cultivar-group)] (GB:NP_0010       |
| 260255.at | AT1G74330     | 241 | 1.87 | 0.000167 | 2.00 | 0.00341  | 3.73 | 0.000008 | ATP binding / protein kinase                                                                                                                          |
| 260264.at | AT1G68500     | 241 | 2.14 | 0.00023  | 2.83 | 0.00027  | 2.30 | 0.000002 | similar to hypothetical protein [Vitis vinifera] (GB:CAN86643.1)                                                                                      |
| 260783.at | AT1G06160     | 241 | 2.14 | 0.00002  | 1.74 | 0.00004  | 3.73 | 0.000002 | ethylene-responsive factor, putative                                                                                                                  |
| 260807.at | AT1G78310     | 241 | 2.00 | 0.00007  | 2.64 | 0.00002  | 2.64 | 0.000002 | VG motif-containing protein                                                                                                                           |
| 260933.at | AT1G62470     | 241 | 2.00 | 0.00007  | 2.00 | 0.00014  | 2.64 | 0.000002 | similar to unknown protein [Arabidopsis thaliana] (TAIRAT1G02475.1); similar to unnamed protein product [Vitis vinifera] (GB:CAO46177.1); contains 1  |
| 263545.at | AT2G21560     | 241 | 2.83 | 0.00002  | 2.83 | 0.00002  | 1.74 | 0.000552 | similar to unknown protein [Arabidopsis thaliana] (TAIRAT4G28160.1); similar to hypothetical protein [Vitis vinifera] (GB:CAN71202.1)                 |
| 263594.at | AT2G01880     | 241 | 2.83 | 0.00002  | 2.46 | 0.00002  | 2.00 | 0.000002 | ATPAP7/PAP7 (purple acid phosphatase 7); acid phosphatase/ protein serine/threonine phosphatase                                                       |
| 263789.at | AT2G24550     | 241 | 2.00 | 0.00023  | 2.64 | 0.00002  | 2.64 | 0.000002 | similar to unknown protein [Arabidopsis thaliana] (TAIRAT4G31510.1); similar to unknown [Populus trichocarpa x Populus deltoides] (GB:ABK96563.1)     |
| 263897.at | AT2G21940     | 241 | 2.83 | 0.00003  | 2.00 | 0.00003  | 2.46 | 0.000002 | shikimate kinase, putative                                                                                                                            |
| 266541.at | AT2G35110     | 241 | 3.03 | 0.00002  | 2.00 | 0.00002  | 2.30 | 0.000002 | GR1_NAP1/NAPK (NACK-ASSOCIATED PROTEIN); transcription activator                                                                                      |
| 248075.at | AT5G55730     | 235 | 2.46 | 0.00002  | 2.64 | 0.00002  | 2.00 | 0.000004 | FLA1                                                                                                                                                  |
| 248815.at | AT5G47050     | 235 | 2.83 | 0.00002  | 1.87 | 0.00002  | 2.80 | 0.000002 | ATP binding / protein binding / shikimate kinase/ zinc ion binding                                                                                    |
| 248896.at | AT5G45280     | 235 | 2.83 | 0.00002  | 1.87 | 0.00002  | 2.64 | 0.000552 | pectinacetyltransferase, putative                                                                                                                     |
| 249515.at | AT5G38530     | 235 | 2.46 | 0.00002  | 2.30 | 0.00002  | 2.30 | 0.000002 | tryptophan synthase-related                                                                                                                           |
| 250694.at | AT5G06710     | 235 | 1.87 | 0.000552 | 1.87 | 0.00006  | 3.73 | 0.000013 | HAT14 (homeobox-leucine zipper protein 14); DNA binding / transcription factor                                                                        |
| 253512.at | AT4G31750     | 235 | 2.64 | 0.00006  | 2.00 | 0.00088  | 2.46 | 0.000008 | protein phosphatase 2C, putative / PP2C, putative                                                                                                     |
| 253428.at | AT4G03340     | 235 | 2.64 | 0.00004  | 1.41 | 0.00007  | 3.48 | 0.000052 | glyoxylate synthase family 14 protein / core 2/18-branched enzyme family protein                                                                      |
| 255428.at | AT4G20370     | 235 | 2.14 | 0.00001  | 2.14 | 0.00002  | 2.83 | 0.000023 | AC9 (acetylcholine-dependent dioxygenase 1.1); oxidoreductase, acting on paired donors, with incorporation or reduction of molecular oxygen, 2-ox     |
| 255955.at | AT4G01700     | 235 | 2.30 | 0.00002  | 2.00 | 0.00002  | 2.83 | 0.000002 | shikimate, putative                                                                                                                                   |
| 256756.at | AT3G25610     | 235 | 1.74 | 0.00006  | 1.87 | 0.00002  | 4.00 | 0.000002 | haloacid dehalogenase-like hydrolase family protein                                                                                                   |
| 257028.at | AT3G19200     | 235 | 2.46 | 0.00002  | 1.62 | 0.000892 | 3.25 | 0.000004 | similar to unknown protein [Arabidopsis thaliana] (TAIRAT4G34420.1); similar to hypothetical protein [Vitis vinifera] (GB:CAN61148.1)                 |
| 258857.at | AT3G02110     | 235 | 2.83 | 0.00052  | 2.14 | 0.000035 | 2.14 | 0.000046 | SCPL25 (serine carboxypeptidase-like 25); serine carboxypeptidase                                                                                     |
| 261397.at | AT1G79820     | 235 | 2.64 | 0.00002  | 1.74 | 0.00002  | 2.83 | 0.000048 | SGBI-1; carbohydrate transmembrane transporter/sugar/hydrogen ion symporter                                                                           |
| 261405.at | AT1G27460     | 235 | 2.46 | 0.00002  | 2.14 | 0.00002  | 2.64 | 0.000002 | OBP2 (OBP BINDING PROTEIN 2); DNA binding / transcription factor                                                                                      |
| 262416.at | AT1G49390     | 235 | 2.00 | 0.00002  | 3.03 | 0.00002  | 2.14 | 0.000389 | oxidoreductase, 2OG-Fe(II) oxygenase family protein                                                                                                   |
| 264501.at | AT1G09390     | 235 | 2.14 | 0.00002  | 2.64 | 0.000035 | 2.30 | 0.000002 | GDSL-motif lipase/hydrolase family protein                                                                                                            |
| 268229.at | AT2G28840     | 235 | 2.46 | 0.00002  | 2.30 | 0.00002  | 2.30 | 0.000002 | ankyrin repeat family protein                                                                                                                         |
| 245060.at | AT2G39770     | 230 | 2.14 | 0.00002  | 1.87 | 0.00002  | 3.03 | 0.000002 | CYT1 (CYTOKINESIS DEFECTIVE 1); nucleotidyltransferase                                                                                                |
| 247480.at |               |     |      |          |      |          |      |          |                                                                                                                                                       |



|           |                |     |      |          |      |          |      |          |                                                                                                                                                                                                                                                                                                   |
|-----------|----------------|-----|------|----------|------|----------|------|----------|---------------------------------------------------------------------------------------------------------------------------------------------------------------------------------------------------------------------------------------------------------------------------------------------------|
| 245141.at | AT2G45400      | 219 | 2.46 | 0.000035 | 2.00 | 0.000035 | 2.14 | 0.000167 | BEN1: oxidoreductase, acting on CH-OH group of donors                                                                                                                                                                                                                                             |
| 248200.at | AT5G54160      | 219 | 2.64 | 0.00002  | 1.87 | 0.00004  | 2.14 | 0.00002  | ATOMT1 (O-METHYLTRANSFERASE 1)                                                                                                                                                                                                                                                                    |
| 248019.at | AT5G44700      | 219 | 2.46 | 0.000023 | 2.30 | 0.00048  | 1.87 | 0.00049  | ED23 (embryo sac development arrest 23): ATP binding / protein serine/threonine kinase                                                                                                                                                                                                            |
| 248011.at | AT5G23760      | 219 | 1.87 | 0.000027 | 2.64 | 0.00002  | 2.14 | 0.000046 | heavy metal-associated domain-containing protein                                                                                                                                                                                                                                                  |
| 250525.at | AT5G06550      | 219 | 2.64 | 0.00002  | 2.00 | 0.00006  | 2.00 | 0.00002  | ILP1 (INCREASED LEVEL OF POLYPLD1Y-1D): translation repressor                                                                                                                                                                                                                                     |
| 251197.at | AT3G62960      | 219 | 2.00 | 0.00002  | 1.82 | 0.00013  | 3.25 | 0.00002  | glutaredoxin family protein                                                                                                                                                                                                                                                                       |
| 251293.at | AT3G61930      | 219 | 2.46 | 0.00003  | 2.00 | 0.00023  | 2.14 | 0.00003  | unknown protein                                                                                                                                                                                                                                                                                   |
| 252943.at | AT4G39330      | 219 | 2.30 | 0.000046 | 1.74 | 0.00002  | 2.64 | 0.00004  | mannitol dehydrogenase, putative                                                                                                                                                                                                                                                                  |
| 253317.at | AT4G39960      | 219 | 2.00 | 0.000774 | 2.64 | 0.00002  | 2.00 | 0.000088 | similar to unknown protein [Arabidopsis thaliana] (TAIRAT2G15830.1)                                                                                                                                                                                                                               |
| 254665.at | AT1G18250      | 219 | 1.83 | 0.000011 | 1.82 | 0.00014  | 5.26 | 0.00002  | receptor serine/threonine kinase, putative                                                                                                                                                                                                                                                        |
| 259713.at | AT1G17460      | 219 | 2.00 | 0.00013  | 2.00 | 0.00004  | 2.64 | 0.00002  | binding                                                                                                                                                                                                                                                                                           |
| 259823.at | AT1G66250      | 219 | 2.46 | 0.000023 | 2.00 | 0.00052  | 2.14 | 0.000052 | glycosyl hydrolase family 17 protein                                                                                                                                                                                                                                                              |
| 259956.at | AT1G17510      | 219 | 4.00 | 0.000046 | 2.00 | 0.00046  | 1.32 | 0.000052 | RRA2 (REDUCED RESIDUAL ARABINOSE 2)                                                                                                                                                                                                                                                               |
| 262452.at | AT1G11210      | 219 | 1.74 | 0.000966 | 2.83 | 0.00017  | 2.14 | 0.000101 | similar to unknown protein [Arabidopsis thaliana] (TAIRAT1G11220.1); similar to cotton fiber expressed protein I [Gossypium hirsutum] (GBAAC332)                                                                                                                                                  |
| 262677.at | AT1G15860      | 219 | 2.00 | 0.00002  | 2.00 | 0.00002  | 2.64 | 0.00002  | similar to unknown protein [Arabidopsis thaliana] (TAIRAT1G20100.1)                                                                                                                                                                                                                               |
| 267337.at | AT2G39200      | 219 | 2.14 | 0.000078 | 1.87 | 0.000023 | 2.64 | 0.00002  | transferrin-binding protein                                                                                                                                                                                                                                                                       |
| 250233.at | AT5G13460      | 219 | 2.64 | 0.00002  | 2.00 | 0.00002  | 1.74 | 0.00003  | IQG11 (IQ-domain 11): calmodulin binding                                                                                                                                                                                                                                                          |
| 251937.at | KG5M040.AT3G53 | 219 | 2.64 | 0.00002  | 1.82 | 0.00003  | 2.46 | 0.00002  | CGP049 (Conserved peptide upstream open reading frame 47) [Arabidopsis thaliana] (TAIRAT5G03190.1); similar to hypot                                                                                                                                                                              |
| 247333.at | AT5G63600      | 214 | 2.14 | 0.00002  | 2.14 | 0.00002  | 2.14 | 0.00002  | flavonol synthase, putative                                                                                                                                                                                                                                                                       |
| 247377.at | AT5G63180      | 214 | 2.46 | 0.00002  | 1.87 | 0.00002  | 2.14 | 0.000052 | pectate lyase family protein                                                                                                                                                                                                                                                                      |
| 247489.at | AT5G61830      | 214 | 2.14 | 0.00002  | 1.74 | 0.00002  | 2.64 | 0.00002  | short-chain dehydrogenase/reductase (SDR) family protein                                                                                                                                                                                                                                          |
| 245556.at | AT5G50330      | 214 | 2.46 | 0.000069 | 2.14 | 0.000189 | 1.87 | 0.000055 | ATP binding / protein kinase                                                                                                                                                                                                                                                                      |
| 246963.at | AT5G25750      | 214 | 2.30 | 0.00013  | 2.14 | 0.00002  | 2.00 | 0.00004  | AHK2 (ARABIDOPSIS HESTIONE KINASE 2)                                                                                                                                                                                                                                                              |
| 246784.at | AT5G24280      | 214 | 2.46 | 0.000241 | 2.30 | 0.000346 | 1.74 | 0.001077 | ATP binding                                                                                                                                                                                                                                                                                       |
| 246817.at | AT5G23820      | 214 | 2.30 | 0.00002  | 2.64 | 0.00002  | 1.62 | 0.000692 | MD-2-related lipid recognition domain-containing protein / ML domain-containing protein                                                                                                                                                                                                           |
| 250149.at | AT5G14700      | 214 | 2.83 | 0.00002  | 1.52 | 0.000101 | 2.30 | 0.000023 | cinnamoyl-CoA reductase-related                                                                                                                                                                                                                                                                   |
| 252319.at | AT4G34990      | 214 | 2.46 | 0.00002  | 1.82 | 0.000189 | 2.64 | 0.000023 | AMYB32 (myb domain protein 32): DNA binding / transcription factor                                                                                                                                                                                                                                |
| 254167.at | AT4G24400      | 214 | 2.46 | 0.00002  | 1.74 | 0.00002  | 2.30 | 0.00002  | CPB8 (CBL-INTERACTING PROTEIN KINASE 8): kinase                                                                                                                                                                                                                                                   |
| 254324.at | AT4G22460      | 214 | 1.87 | 0.00004  | 2.30 | 0.000027 | 2.30 | 0.000052 | similar to unknown protein [Arabidopsis thaliana] (TAIRAT4G22466.1); similar to unknown protein [Arabidopsis thaliana] (TAIRAT4G22466.2); contains similar to unknown protein [Arabidopsis thaliana] (TAIRAT1G01360.1); similar to hypothetical protein [Vitis vinifera] (GBFAP63139.1); contains |
| 255602.at | AT4G01026      | 214 | 2.30 | 0.00002  | 1.87 | 0.00002  | 2.30 | 0.00002  | AZF2 (ARABIDOPSIS ZINC-FINGER PROTEIN 2): nucleic acid binding / transcription factor / zinc ion binding                                                                                                                                                                                          |
| 257022.at | AT3G19580      | 214 | 1.62 | 0.005409 | 1.74 | 0.000214 | 3.48 | 0.00002  | MYB30 (myb domain protein 30): DNA binding / transcription factor                                                                                                                                                                                                                                 |
| 257140.at | AT3G28910      | 214 | 1.87 | 0.00006  | 1.87 | 0.00002  | 2.83 | 0.00002  | similar to unknown protein [Arabidopsis thaliana] (TAIRAT1G23710.1); similar to hypothetical protein [Vitis vinifera] (GBCAN1665.1); similar to unna                                                                                                                                              |
| 257226.at | AT3G27880      | 214 | 2.14 | 0.00002  | 1.87 | 0.00002  | 2.46 | 0.00002  | similar to unknown protein [Arabidopsis thaliana] (TAIRAT1G23710.1); similar to hypothetical protein [Vitis vinifera] (GBCAN1665.1); similar to unna                                                                                                                                              |
| 257559.at | AT3G24120      | 214 | 2.30 | 0.00002  | 1.74 | 0.00002  | 2.46 | 0.00002  | myb family transcription factor                                                                                                                                                                                                                                                                   |
| 257673.at | AT2G23990      | 214 | 2.14 | 0.00002  | 2.14 | 0.00002  | 2.14 | 0.00002  | ID29 (IQ-domain 29): calmodulin binding                                                                                                                                                                                                                                                           |
| 257868.at | AT3G25070      | 214 | 2.14 | 0.00002  | 1.87 | 0.00002  | 2.46 | 0.00002  | RM4 (RPM1 INTERACTING PROTEIN 4): protein binding                                                                                                                                                                                                                                                 |
| 259611.at | AT1G52280      | 214 | 2.00 | 0.00002  | 2.46 | 0.00002  | 2.46 | 0.00002  | ARAB34 (Arabidopsis Rab GTPase homolog G34): GTP binding                                                                                                                                                                                                                                          |
| 260407.at | AT1G69910      | 214 | 3.03 | 0.000114 | 1.87 | 0.000114 | 1.74 | 0.004925 | protein kinase family protein                                                                                                                                                                                                                                                                     |
| 260414.at | AT1G69850      | 214 | 2.46 | 0.00002  | 1.74 | 0.00002  | 2.30 | 0.00002  | ATNR1.2 (NITRATE TRANSPORTER 1.2): calcium ion binding / transporter                                                                                                                                                                                                                              |
| 260771.at | AT1G49690      | 214 | 2.46 | 0.000023 | 2.00 | 0.000023 | 2.30 | 0.00002  | JAZ2 (JAZ1-LIKE JASMONATE-ZIM-DOMAIN PROTEIN 2)                                                                                                                                                                                                                                                   |
| 260551.at | AT1G20590      | 214 | 2.14 | 0.00002  | 1.74 | 0.00002  | 2.64 | 0.00002  | ICS: ribosomal protein S19 (RPS19)                                                                                                                                                                                                                                                                |
| 260302.at | AT2G27050      | 214 | 2.30 | 0.00002  | 2.00 | 0.00002  | 2.14 | 0.00002  | ELL (ETHYLENE-INSENSITIVE3-LIKE 1): transcription factor                                                                                                                                                                                                                                          |
| 260683.at | AT2G39400      | 214 | 1.52 | 0.000189 | 1.82 | 0.000346 | 4.00 | 0.00002  | hydrolase, alpha/beta fold family protein                                                                                                                                                                                                                                                         |
| 267069.at | AT2G41010      | 214 | 2.14 | 0.000966 | 2.00 | 0.000041 | 2.30 | 0.000068 | ATCAMP25 (ARABIDOPSIS THALIANA CALMODULIN (CAM)-BINDING PROTEIN OF 25 KDa): calmodulin binding                                                                                                                                                                                                    |
| 245330.at | AT4G14930      | 209 | 2.30 | 0.00003  | 1.62 | 0.00002  | 2.46 | 0.00002  | acid phosphatase survival protein SurE, putative                                                                                                                                                                                                                                                  |
| 246494.at | AT5G16190      | 209 | 2.14 | 0.000101 | 2.00 | 0.000023 | 2.14 | 0.00013  | ATCSLA11 (Cellulose synthase-like A11): transferase, transferring glycosyl groups                                                                                                                                                                                                                 |
| 245538.at | AT5G11520      | 209 | 2.14 | 0.00002  | 2.00 | 0.00002  | 2.14 | 0.00002  | glucanase family protein                                                                                                                                                                                                                                                                          |
| 246968.at | AT5G61720      | 209 | 2.30 | 0.000023 | 2.14 | 0.00002  | 1.87 | 0.00002  | RLK (RECEPTOR-LIKE KINASE), ATP binding / kinase / protein serine/threonine kinase                                                                                                                                                                                                                |
| 247624.at | AT5G60160      | 209 | 2.14 | 0.00002  | 1.74 | 0.00002  | 2.46 | 0.000035 | aspartyl aminopeptidase, putative                                                                                                                                                                                                                                                                 |
| 247734.at | AT5G59400      | 209 | 1.87 | 0.000273 | 1.82 | 0.000114 | 3.03 | 0.00002  | similar to hypothetical protein [Vitis vinifera] (GBCAN4889.1)                                                                                                                                                                                                                                    |
| 248148.at | AT5G54930      | 209 | 2.00 | 0.000438 | 2.30 | 0.00002  | 2.00 | 0.000307 | AT hook motif-containing protein                                                                                                                                                                                                                                                                  |
| 248154.at | AT5G54400      | 209 | 2.64 | 0.000114 | 1.74 | 0.001486 | 2.00 | 0.00002  | methyltransferase                                                                                                                                                                                                                                                                                 |
| 246962.at | AT5G49330      | 209 | 2.64 | 0.00002  | 2.00 | 0.00002  | 2.64 | 0.00002  | regulator of divaricose condensation (RCC1) family protein                                                                                                                                                                                                                                        |
| 246777.at | AT5G24210      | 209 | 1.74 | 0.00002  | 1.52 | 0.00002  | 3.46 | 0.00002  | lipase class 3 family protein                                                                                                                                                                                                                                                                     |
| 250735.at | AT5G06280      | 209 | 2.46 | 0.000966 | 1.74 | 0.000027 | 2.14 | 0.000035 | similar to hypothetical protein [Vitis vinifera] (GBCAN7410.1)                                                                                                                                                                                                                                    |
| 253225.at | AT4G35020      | 209 | 2.00 | 0.00002  | 2.00 | 0.00002  | 2.30 | 0.00002  | ARAC3/ATROP6/RHO1PS/ROP6 (rho-related protein from plants 6): GTP binding / GTPase                                                                                                                                                                                                                |
| 253603.at | AT4G30935      | 209 | 2.30 | 0.000241 | 1.87 | 0.00002  | 3.03 | 0.000023 | WRKY32 (WRKY DNA-binding protein 32): transcription factor                                                                                                                                                                                                                                        |
| 253789.at | AT4G28400      | 209 | 2.14 | 0.000078 | 2.14 | 0.00002  | 2.30 | 0.00002  | protein phosphatase 2C, putative / PP2C, putative                                                                                                                                                                                                                                                 |
| 254363.at | AT4G22010      | 209 | 2.14 | 0.000101 | 2.30 | 0.00002  | 1.87 | 0.00002  | SK54 (SKUS Similar 4): copper ion binding / oxidoreductase                                                                                                                                                                                                                                        |
| 254372.at | AT4G21620      | 209 | 2.14 | 0.00002  | 2.00 | 0.00002  | 2.14 | 0.00002  | glycine-rich protein                                                                                                                                                                                                                                                                              |
| 254434.at | AT4G20880      | 209 | 1.74 | 0.000088 | 2.00 | 0.000035 | 2.64 | 0.00002  | ethylene-responsive nuclear protein / ethylene-regulated nuclear protein (ERT2)                                                                                                                                                                                                                   |
| 254520.at | AT4G19960      | 209 | 2.30 | 0.000068 | 1.87 | 0.00006  | 2.14 | 0.000088 | potassium ion transmembrane transporter                                                                                                                                                                                                                                                           |
| 255851.at | AT4G00940      | 209 | 2.46 | 0.00004  | 2.00 | 0.000307 | 1.87 | 0.000114 | Dot-type zinc finger domain-containing protein                                                                                                                                                                                                                                                    |
| 255990.at | AT4G03060      | 209 | 1.87 | 0.00003  | 1.62 | 0.00002  | 3.03 | 0.00002  | CYP86A2 (ABERRANT INDUCTION OF TYPE THREE GENES 1): oxygen binding                                                                                                                                                                                                                                |
| 256160.at | AT1G30120      | 209 | 2.30 | 0.00002  | 2.00 | 0.00002  | 2.14 | 0.00002  | PEN1 (PENETRANT HYDROLYTIC DEHYDRONASE E1 BETA): pyruvate dehydrogenase (acetyl-transferring)                                                                                                                                                                                                     |
| 257121.at | AT3G26590      | 209 | 1.87 | 0.00003  | 2.14 | 0.00002  | 2.30 | 0.00002  | MATE efflux family protein                                                                                                                                                                                                                                                                        |
| 258702.at | AT3G09730      | 209 | 2.64 | 0.000147 | 1.74 | 0.000438 | 2.00 | 0.00249  | similar to unnamed protein product [Vitis vinifera] (GB-CAO18124.1)                                                                                                                                                                                                                               |
| 259568.at | AT1G20490      | 209 | 2.14 | 0.000147 | 1.74 | 0.004073 | 2.46 | 0.000273 | AMP-dependent synthetase and lipase family protein                                                                                                                                                                                                                                                |
| 259670.at | AT1G52310      | 209 | 2.46 | 0.00002  | 1.87 | 0.00002  | 2.00 | 0.00002  | protein kinase family protein / C-type lectin domain-containing protein                                                                                                                                                                                                                           |
| 259736.at | AT1G64390      | 209 | 2.83 | 0.00002  | 1.41 | 0.000023 | 2.30 | 0.00002  | ATY9G2 (ARABIDOPSIS THALIANA GLYCOSYL HYDROLASE 9C2): hydrolase, hydrolyzing O-glycosyl compounds                                                                                                                                                                                                 |
| 261317.at | AT1G69790      | 209 | 2.14 | 0.000046 | 1.74 | 0.00002  | 2.46 | 0.000027 | lipase class 3 family protein                                                                                                                                                                                                                                                                     |
| 261466.at | AT1G28440      | 209 | 2.30 | 0.00002  | 1.87 | 0.00002  | 2.14 | 0.000023 | HS1 (HSEAS-LIKE 1): ATP binding / kinase / protein serine/threonine kinase                                                                                                                                                                                                                        |
| 261552.at | AT1G63430      | 209 | 2.64 | 0.00002  | 1.87 | 0.00002  | 1.87 | 0.000685 | leucine-rich repeat transmembrane protein kinase, putative                                                                                                                                                                                                                                        |
| 262882.at | AT1G75900      | 209 | 2.64 | 0.00002  | 2.14 | 0.000046 | 1.62 | 0.000389 | family II extracellular lipase 3 (EXL3)                                                                                                                                                                                                                                                           |
| 262736.at | AT1G28570      | 209 | 2.46 | 0.00002  | 2.00 | 0.000214 | 1.87 | 0.000068 | GDSL-motif lipase, putative                                                                                                                                                                                                                                                                       |
| 263470.at | AT2G31900      | 209 | 2.00 | 0.000147 | 2.00 | 0.000074 | 2.30 | 0.000438 | XIF (Myosin-like protein XIF)                                                                                                                                                                                                                                                                     |
| 263807.at | AT2G04400      | 209 | 1.87 | 0.000078 | 1.52 | 0.00002  | 3.25 | 0.00002  | indole-3-glycerol phosphate synthase (IGPS)                                                                                                                                                                                                                                                       |
| 264897.at | AT1G23220      | 209 | 2.00 | 0.00002  | 2.14 | 0.00002  | 2.83 | 0.00002  | hypoxanthine-responsive family protein                                                                                                                                                                                                                                                            |
| 265120.at | AT1G62640      | 209 | 2.14 | 0.00002  | 2.46 | 0.00002  | 1.74 | 0.00002  | KAS III (3-HETOYLACYL CARRIER PROTEIN SYNTHASE III): 3-oxoacyl-[acyl-carrier-protein] synthase                                                                                                                                                                                                    |
| 266964.at | AT2G39480      | 209 | 2.00 | 0.00002  | 1.87 | 0.00002  | 2.46 | 0.00002  | PGP6 (ATPase, coupled to transmembrane movement of substances)                                                                                                                                                                                                                                    |
| 267230.at | AT2G44080      | 209 | 1.87 | 0.002753 | 1.52 | 0.000035 | 3.73 | 0.000002 | ARL (ARGOS-LIKE)                                                                                                                                                                                                                                                                                  |
| 245853.at | AT5G13500      | 205 | 1.87 | 0.00002  | 2.30 | 0.00002  | 2.00 | 0.000147 | similar to unknown protein [Arabidopsis thaliana] (TAIRAT5G25265.1); similar to unnamed protein product [Vitis vinifera] (GB-CAO42819.1)                                                                                                                                                          |
| 246143.at | AT5G19980      | 205 | 2.14 | 0.00002  | 2.00 | 0.00004  | 2.00 | 0.00002  | integral membrane family protein                                                                                                                                                                                                                                                                  |
| 245744.at | AT5G21760      | 205 | 2.00 | 0.00002  | 1.52 | 0.00002  | 2.83 | 0.00002  | hypoxanthine-responsive family protein                                                                                                                                                                                                                                                            |
| 248752.at | AT5G47600      | 205 | 4.00 | 0.00002  | 1.15 | 0.001201 | 1.87 | 0.001338 | heat shock protein-related                                                                                                                                                                                                                                                                        |
| 248763.at | AT5G47550      | 205 | 2.46 | 0.000046 | 1.23 | 0.000374 | 2.83 | 0.00002  | cysteine protease inhibitor, putative / cystatin, putative                                                                                                                                                                                                                                        |
| 249068.at | AT5G43980      | 205 | 2.30 | 0.00004  | 1.23 | 0.000355 | 3.03 | 0.00002  | receptor-like protein kinase-related                                                                                                                                                                                                                                                              |
| 249284.at | AT5G41810      | 205 | 2.14 | 0.00002  | 1.74 | 0.00002  | 2.30 | 0.00002  | similar to unknown protein [Arabidopsis thaliana] (TAIRAT1G64340.1); similar to Avr9/Cf-9 rapidly elicited protein 194 [Nicotiana tabacum] (GBAAG)                                                                                                                                                |
| 249988.at | AT5G18310      | 205 | 2.14 | 0.00002  | 1.62 | 0.00002  | 2.46 | 0.00002  | similar to unknown protein [Arabidopsis thaliana] (TAIRAT5G48500.1); similar to unnamed protein product [Vitis vinifera] (GB-CAO38794.1)                                                                                                                                                          |
| 250515.at | AT5G09570      | 205 | 1.62 | 0.001077 | 2.46 | 0.000101 | 2.14 | 0.000041 | similar to unknown protein [Arabidopsis thaliana] (TAIRAT5G64400.1); similar to unknown [Populus trichocarpa] (GBAB                                                                                                                                                                               |

**Supplemental Table S2.** Trichome and Trichome Branch Numbers of Transgenic Plants Harboring *GL2* Promoter-driven bHLH-GFP Genes.

|                 | WT     | <i>GL2pro-RHD6-GFP</i> | <i>GL2pro-LRL1-GFP</i> | <i>GL2pro-LRL1-GFP</i> × <i>GL2pro-RHD6-GFP</i> |
|-----------------|--------|------------------------|------------------------|-------------------------------------------------|
| Trichome number | 243±51 | 224±33                 | 230±53                 | 131±39                                          |
| 1 branch (%)    | 0.5    | 0.9                    | 0.9                    | 0.7                                             |
| 2 branches (%)  | 3.7    | 5.0                    | 4.7                    | 7.4                                             |
| 3 branches (%)  | 94.5   | 91.4                   | 92.2                   | 81.7                                            |
| 4 branches (%)  | 1.3    | 2.7                    | 2.2                    | 9.9                                             |
| 5 branches (%)  | 0      | 0                      | 0                      | 0.3                                             |

The 10th–12th leaves of the wild type, homozygous transgenic lines (*GL2pro-RHD6-GFP* and *GL2pro-LRL1-GFP*), and the F1 progeny of the transgenic line (*GL2pro-RHD6-GFP* × *GL2pro-LRL1-GFP*) with a moderate trichome phenotype were observed. Numbers of trichomes on a leaf (mean ± s.d.,  $n = 20$ ) and ratios (%) of trichomes with each number of branches ( $n > 1,000$ ) are presented.

**Supplemental Table S3.** List of Primers Used in This Study.

| Primer name          | Sequence                    | Annotation  |
|----------------------|-----------------------------|-------------|
| TUB2-real-F          | GTTCTCGATGTTGTTTCGTAAG      | for qRT-PCR |
| TUB2-real-R          | TGTAAGGCTCAACCACAGTAT       |             |
| PLD $\zeta$ 1-real-F | CTTCTCTTGTGTGCCCAATG        |             |
| PLD $\zeta$ 1-real-R | CTGGTGCTATTCCCAAATCG        |             |
| LRL1-real-F          | GTGCTGCTTCCGTTTCTTCT        |             |
| LRL1-real-R          | GAGACAAAGACCTTTCCTTGA       |             |
| LRL2-real-F          | CTGCTTCTGCTTCTTCTCAAATCTCTG |             |
| LRL2-real-R          | GTGGAGATGGTGGTGGCTAACGAG    |             |
| LRL3-real-F          | TGTTGGACGAGATCATCGAG        |             |
| LRL3-real-R          | TCCTGTAGCGTTTCCATTCC        |             |
| bHLH7-real-F         | GCTGTCGCACCACTAGTCACTGAAA   |             |
| bHLH7-real-R         | CTGGTGGCTGAGAATGGTAAATCGC   |             |
| bHLH59-real-F        | GGTGCGGTTGCTCCACTTGTACTG    |             |
| bHLH59-real-R        | TTTGATTGAAGAAGCTGCATCGCGG   |             |
| RHD6-real-F          | TGATTTGGTGACAATGCTTGA       |             |
| RHD6-real-R          | GGAGAGAATGGCATCAATGG        |             |
| RSL1-real-F          | TGAGAAAGCAATTGGCTATGTAAAG   |             |
| RSL1-real-R          | CTCGTTGTGATGATGAGAGGATTGC   |             |
| RSL2-real-F          | AAAACAAGAGCCAGTCGTGGTGCAG   |             |
| RSL2-real-R          | AAGCAATCGGCGCATAATCCATAG    |             |
| RSL4-real-F          | GAAGAGAGAAGATTAACGAAAGGC    |             |
| RSL4-real-R          | CAGGCCGTTGTAAGCCAATGGTGC    |             |
| bHLH84-real-F        | GTTGATATTAGCACGATGTTGGAAG   |             |

---

|                |                                     |          |
|----------------|-------------------------------------|----------|
| bHLH84-real-R  | TCTGGTCAGTGCATTGAGTTTTAGG           |          |
|                |                                     |          |
| ACT7-ChIP-F    | CAGTCACGAGAAAAAAACCACAGTC           | for ChIP |
| ACT7-ChIP-R    | GGACATCGTTCAAATTTTATTCTCG           |          |
| PLDz1-ChIP-F   | CTACATAGTATAAGATCACTGATTTG          |          |
| PLDz1-ChIP-R   | CGACTTTGACCTCTCTCTCC                |          |
| LRL1-ChIP-F1   | CAACAACAAAACAAATCATTAAACTACATGAAAAC |          |
| LRL1-ChIP-R1   | GTGCTAAGTGTAATAGCTAGCTTTTG          |          |
| LRL1-ChIP-F2   | GTTTCATGTTAGCAATTAATGGAAAAGAGG      |          |
| LRL1-ChIP-R2   | GTCCGGATGTTTGACACTTCTTC             |          |
| LRL1-ChIP-NF   | TCATTGGGTAACACTTAGGTGGTCC           |          |
| LRL1-ChIP-NR   | AAGGAGAATGATGAAACCAAACGAC           |          |
| LRL2-ChIP-F1   | GCTTTCATGTTTCTCAAGTAGAG             |          |
| LRL2-ChIP-R1   | GTCTTGGTTCTTACTCTATTAGTC            |          |
| bHLH82-ChIP-NF | CAAAAACAATTATACAAAGAGGCCG           |          |
| bHLH82-ChIP-NR | TACTGGCCGTTTCATTTGTTCTTTC           |          |
| RHD6-ChIP-F1   | ATTTATTTACAATAATGTTGGGCG            |          |
| RHD6-ChIP-R1   | TGCTTTCAAATAAAACATTCACACC           |          |
| RSL1-ChIP-F1   | TTGATCTCATGCCAGCTTCCTCTC            |          |
| RSL1-ChIP-R1   | TATCATAAAGGTTTATATAGGCGG            |          |
| RSL1-ChIP-F2   | TAGATTGAATGTCATGCAACTTGGG           |          |
| RSL1-ChIP-R2   | AAATACCACATTTACTTGGTCGTTC           |          |
| RSL2-ChIP-F1   | TATCTAATGGTATCCCAGACTTG             |          |
| RSL2-ChIP-R1   | ATAGTGGATAAATAAATGTCAAC             |          |
| RSL2-ChIP-F2   | TGTTCTTAGTTTCGTAAATTAGATGG          |          |

---

---

|              |                                     |              |
|--------------|-------------------------------------|--------------|
| RSL2-ChIP-R2 | TCCCATCTATTTTGTGATTTGAAG            |              |
| RSL2-ChIP-F3 | CGTCACATGACGTAAATCATAGTAAG          |              |
| RSL2-ChIP-R3 | CACTATCTATCTCAGTTAAATGTGTATGAC      |              |
|              |                                     |              |
| eGFP-F       | ATGGTGAGCAAGGGCGAGGAGC              | for cloning* |
| eGFP-R       | CTTGTACAGCTCGTCCATGCCG              |              |
| GL2-pF       | AAGCTTTTGAATTGTAGATAAATCA           |              |
| GL2-pR       | ACAAATCCTGTCCCTAGCTAGCTTCTTTGCTTAAT |              |
| RHD6-pF      | TTTTTCAAATGAGTTTTTATTTCTAGATT       |              |
| RHD6-pR      | TAGACACTAATAAGTTTGATAAGTGATTTT      |              |
| RSL1-pF      | ACCAATTGGTTAATCTTATAAGTCGCAC        |              |
| RSL1-pR      | TGGTACTAAAGGGTGTCTAGTGAGATG         |              |
| RSL2-pF      | CCTTTCTTTCCTATTTTTGTTCGTTT          |              |
| RSL2-pR      | TTTTATATGTTTTGTTAACTAAGCGTC         |              |
| LRL1-pF      | TCAATGAACTTATCCATGGTACG             |              |
| LRL1-pR      | GATGATGATGGGTTTCTTCTGCTTC           |              |
| LRL2-pF      | GAGGCGGTTGGGTTTAACGACCCG            |              |
| LRL2-pR      | GGCTTCTGTTTTTTTTTTTTTTGGTGGGG       |              |
| GL2-CDSF     | ATGTCAATGGCCGTCGACATGTCTT           |              |
| GL2-CDSR     | TCAGCAATCTTCGATTTGTAGACTTCTCTT      |              |
| RHD6-CDSF    | ATGGCACTCGTTAATGACCATCCC            |              |
| RHD6-CDSR    | TTAATTGGTGATCAGATTCGAATTCC          |              |
| RSL1-CDSF    | ATGTCACATTAACGAACATTGCAATG          |              |
| RSL1-CDSR    | TTATTCTGCTATACTTGTCTCTAGTTG         |              |
| RSL2-CDSF    | ATGGAAGCCATGGGAGAATGGAGC            |              |

---

---

|               |                               |                 |
|---------------|-------------------------------|-----------------|
| RSL2-CDSR     | TCATCTCGGTGAGCTGAGACCAATG     |                 |
| LRL1-CDSF     | ATGATGAACTCTTCTCTTCTAACTCCTTC |                 |
| LRL1-CDSR     | TCACGCTTTCGAAACGGATACGGCCTC   |                 |
| LRL1-genomicR | AGTGAAAAACCAATATACTATTTTTTTC  |                 |
| LRL2-CDSF     | ATGAACTCCTCGTCTCTTCTAACTCC    |                 |
| LRL2-CDSR     | TCACGGCTTGAAACGGAGGGAGCG      |                 |
|               |                               |                 |
| gl2-5LB       | GGATTTCCTGGGCAGAAGAGTA        | for genotyping  |
| gl2-5RB       | GGATAGGGAGTGCGTCCAAGAG        |                 |
| LBb1.3        | ATTTTGCCGATTTTCGGAAC          |                 |
| LRL1-1-LB     | AGAAGACGACCTCTCGGTCAC         |                 |
| LRL1-1-RB     | GGGGTAATTCTTTTACAGAG          |                 |
| LRL2-1-LB     | GGACAAATGGCCGTTATCACGGCTTG    |                 |
| LRL2-1-RB     | GGACCACAAATTGCTACTAGTTTAGTAGG |                 |
|               |                               |                 |
| lrl1-2-TDNA-F | CAGCTACTGGTGGTACGGTGG         | for checking of |
| lrl1-2-TDNA-R | GTCGACTGTATGGTCATGCCAG        | T-DNA           |
| lrl2-2-TDNA-F | CTCTCCCTTCCACCTCCCTC          | insertion       |
| lrl2-2-TDNA-R | GTTAGGAGACAAAGGAACGCCGG       |                 |

---

\*The recombination sites of the Gateway system were not included in these primers. Sequences of the recombination sites (see the Invitrogen Gateway™ Technology Instruction Manual) should be added when they are used in the Gateway system.

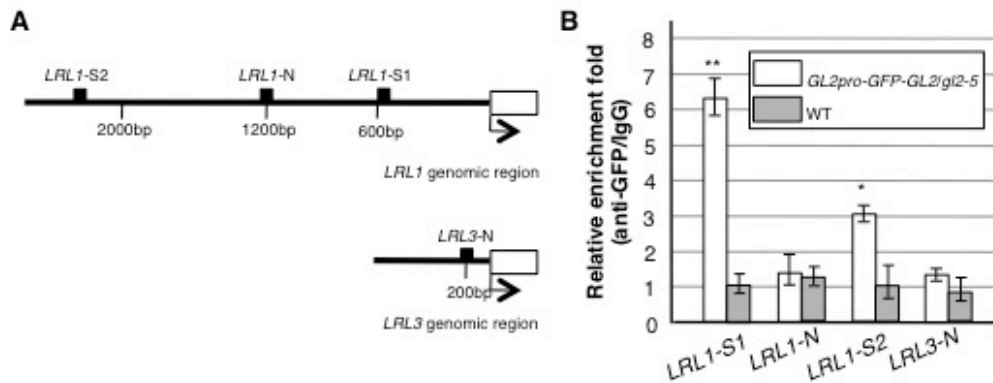

**Supplemental Figure S1.** ChIP Analysis for the GL2 Binding to the *LRL1* and *LRL3* Upstream Regions.

**(A)** The regions amplified in the ChIP analysis, *LRL1-S1*, *LRL1-N*, *LRL1-S2* and *LRL3-N*, are schematically illustrated. The L1 box-like sequence exists in *LRL1-S1* and *LRL1-S2*, but not in *LRL1-N* or *LRL3-N*.

**(B)** Results of the ChIP analysis of the regions illustrated in **(A)** are shown. Relative enrichment folds (anti-GFP/IgG) in *GL2pro-GFP-GL2/gl2-5* roots and wild-type roots are shown in white and gray boxes, respectively (mean  $\pm$  s.d.,  $n = 3$ ). Asterisks indicate that the enrichment in *GL2pro-GFP-GL2/gl2-5* is significantly different from that in the wild type (\*  $P < 0.05$ ; \*\*  $P < 0.01$ , Student's *t*-test).

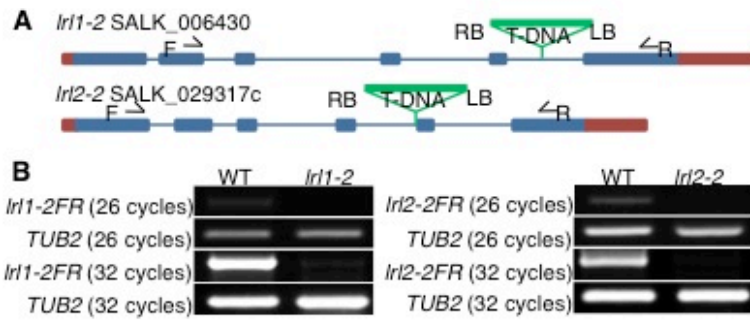

**Supplemental Figure S2.** Expression Analysis of the *lrl1-2* and *lrl2-2* Mutant Genes.

**(A)** The gene structures and T-DNA insertion sites of *lrl1-2* (SALK\_006430) and *lrl2-2* (SALK\_029317c) are schematically illustrated. Horizontal arrows labeled with F and R indicate the locations of the PCR primers used in **(B)**.

**(B)** The results of semi-quantitative RT-PCR analysis for *LRL1* and *LRL2* transcripts in wild-type and mutant plants are shown. Transcripts of the *TUBULIN2* (*TUB2*) gene were used as reference.



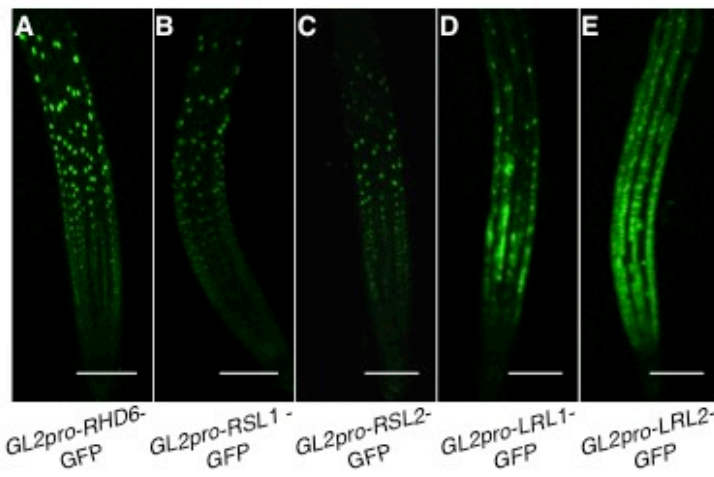

**Supplemental Figure S3.** Expression Patterns and Intensities of bHLH-GFP Fusion Proteins Driven by the *GL2* Promoter.

The GFP fluorescence signals in transgenic roots harboring *GL2pro-RHD6-GFP* (A), *GL2pro-RSL1-GFP* (B), *GL2pro-RSL2-GFP* (C), *GL2pro-LRL1-GFP* (D), and *GL2pro-LRL2-GFP* (E) are shown. Bar = 100  $\mu$ m

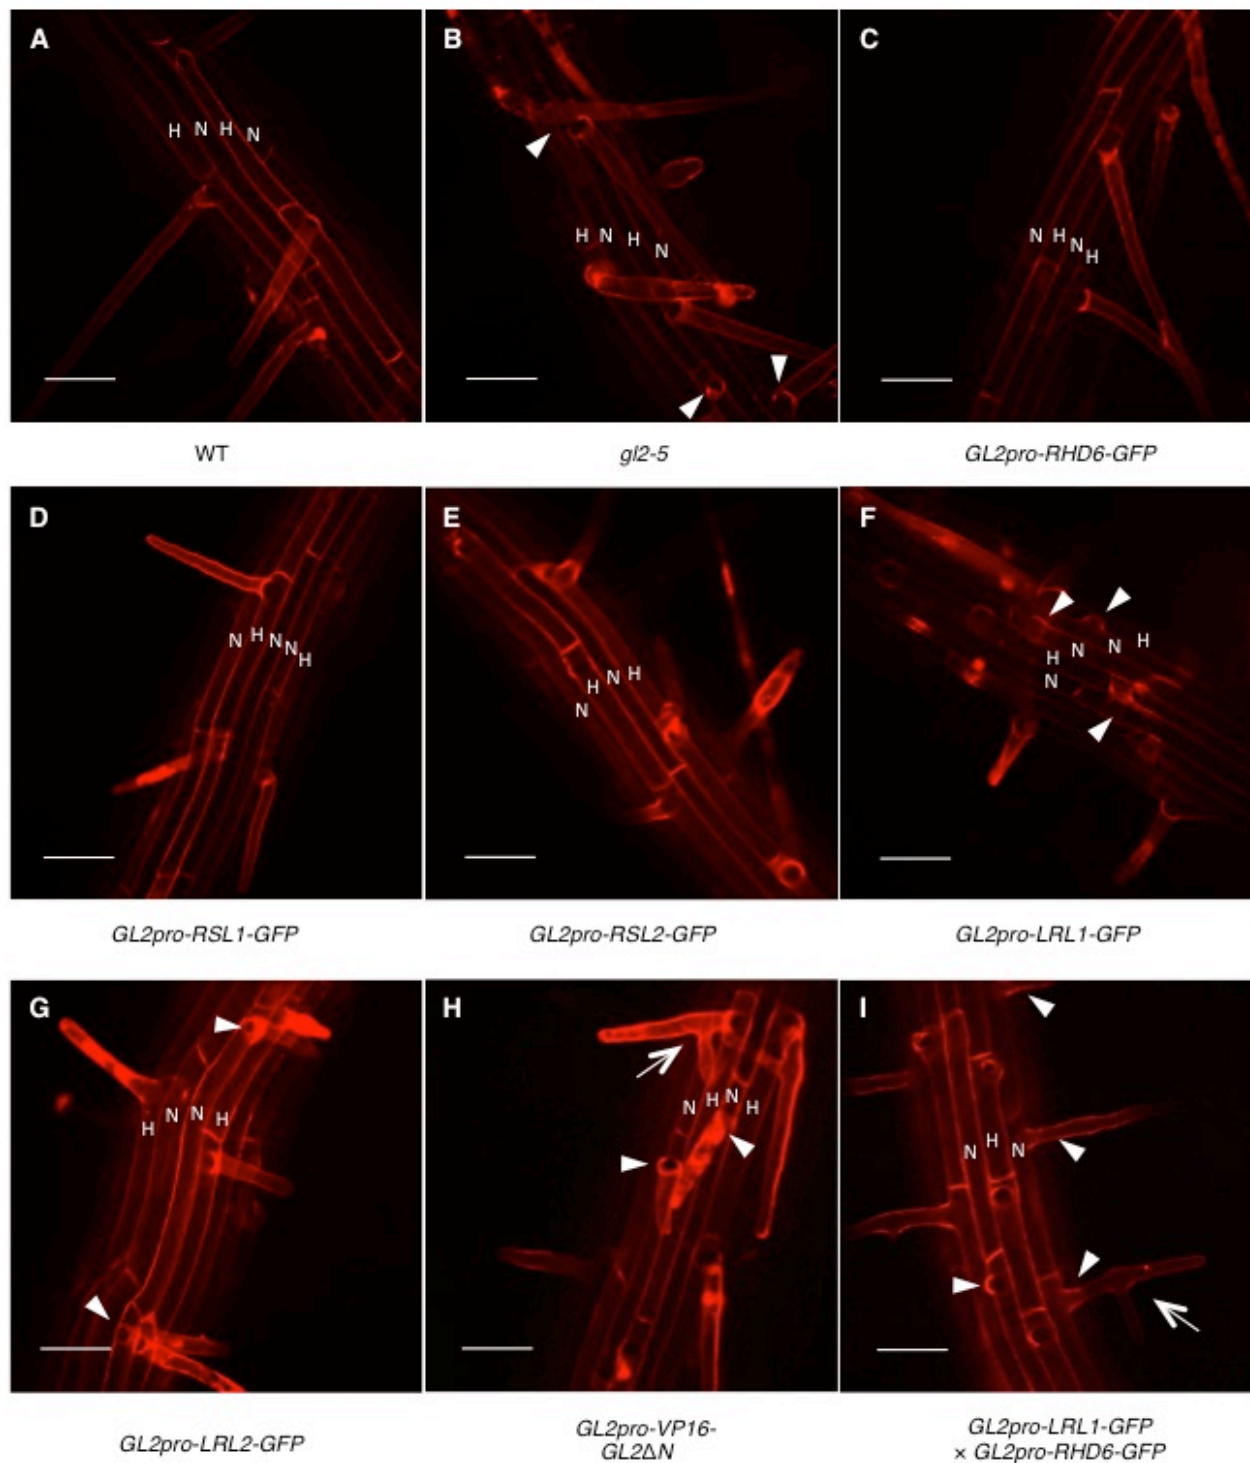

**Supplemental Figure S4.** Root Hair Development Patterns of the Transgenic Plants Harboring the *GL2* Promoter-driven bHLH-GFP Genes.

PI-stained Epidermal cells of wild-type (A) and *gl2-5* (B) roots, and transgenic roots harboring *GL2pro-RHD6-GFP* (C), *GL2pro-RSL1-GFP* (D), *GL2pro-RSL2-GFP* (E), *GL2pro-LRL1-GFP* (F), *GL2pro-LRL2-GFP* (G), *GL2pro-VP16-GL2ΔN* (H), and *GL2pro-LRL1-GFP* and *GL2pro-RHD6-GFP* (I) are shown. H and N cell files are marked by "H" and "N", respectively. Ectopic root hairs developing from N cell files and branching root hairs are indicated by arrowheads and arrows, respectively. Bar = 25 μm

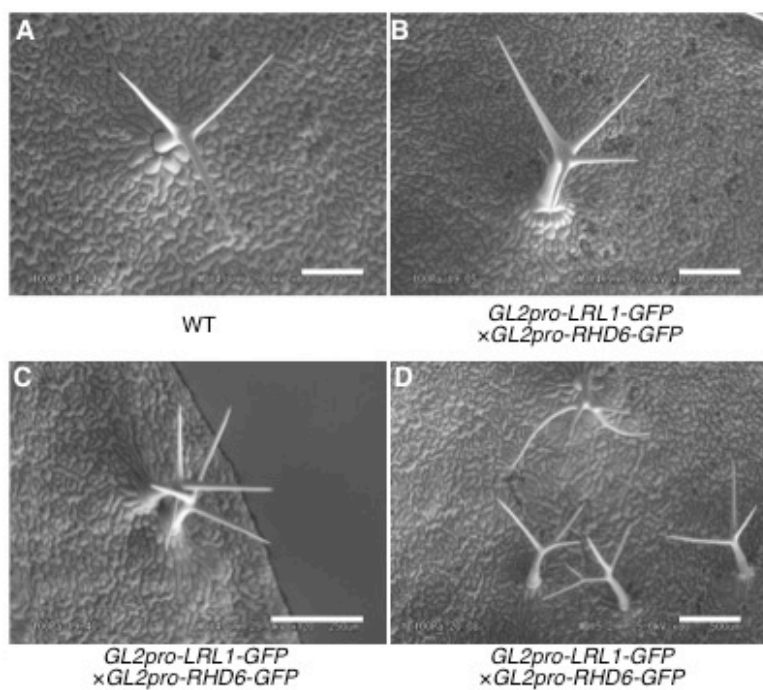

**Supplemental Figure S5.** Trichome Phenotypes of Transgenic Plants Harboring Both *GL2pro-LRL1-GFP* and *GL2pro-RHD6-GFP*. Trichomes of wild-type plants (**A**) and transgenic plants harboring both *GL2pro-LRL1-GFP* and *GL2pro-RHD6-GFP* (**B to D**) are shown. Bar = 250  $\mu$ m

| Site name                       | L1 box-like sequence                                                                        |
|---------------------------------|---------------------------------------------------------------------------------------------|
| <i>PLD<math>\zeta</math></i> -S | 5' -ATAGTATAAGATCACTGATTTGATTAATAAAATGTTAAGAAAATAA-3'                                       |
| <i>CESA5</i> -S                 | 5' -ACAGAAGAACAATAAGAGGGAAATAATAAAATGTTAAAGGGTGATC-3'                                       |
| <i>MYB23</i> -S                 | 5' -ATTATAAACATCTTGTGAAAAAGAATTTAAATGTACCCATTTTGTG-3'                                       |
| <i>PAP2</i> -S                  | 5' -AAATAATTAATAATTAATCAGATGATAAAATGTAATCAAATAAT-3'                                         |
| <i>MYB113</i> -S                | 5' -ATGCACATAATTACTTAACCTAAGAACTAAATGTTGCATTGATTC-3'                                        |
| <i>RHD6</i> -S                  | 5' -TTACTCGCTCGGCCCATCAAAAATGAGTAAATGTTAACTGGTTTG-3'                                        |
| <i>RSL1-S1</i>                  | 5' -TATAACAAACAAAAATAAACTACATCTAAATGTCATCATTTAAT-3'                                         |
| <i>RSL1-S2</i>                  | 5' -CAAAACAAGTACCACGAACGACCAAGTAAATGTGGTATTTTTTT-3'                                         |
| <i>RSL2-S1</i>                  | 5' -TAGAGAACATGAGAGATAGTGGATAAATAAAATGTCAACACATAAT-3'                                       |
| <i>RSL2-S2</i>                  | 5' -AGTTTCGTAAATTAGATGGTTAATTTTTAAATGTTTCATCAAAAA-3'                                        |
| <i>LRL1-S2</i>                  | 5' -GACTACAAAATACAGACCTCGAAACCTTAAATGTATTAGTTAATG-3'                                        |
| <i>LRL2-S</i>                   | 5' -CAAATAAATAAACATATCTTATTTCCTTAAATGTAATTCATTCT-3'                                         |
| Frequently appearing base       | 5' -AAA-AA <sup>A</sup> AAAAA--A-A-A-T-AA--A-TAAATGT-A-----T <sup>A</sup> <sub>T</sub> --3' |

**Supplemental Figure S6. Sequences Surrounding the L1 Box-like Sites Recognized by GL2.**

DNA sequences surrounding the L1 box-like sites that have confirmed to be bound to GL2 individually by ChIP analysis are aligned. The sites *CESA5*-S, *MYB23*-S, *PAP2*-S, and *MYB113*-S correspond to the L1 box-like sites 802-, 2,372-, 1755-, and 837-base upstream from their initiation codons, respectively. The other sites are the same as those shown in Table II. The sites, *RSL2-S3-1*, *RSL2-S3-2*, *LRL1-S1-1*, *LRL1-S1-2*, and those in the *TT8* promoter region are omitted because they were examined for GL2 binding to more than one copy of the L1 box like-sequence. The L1 box-like sequence is highlighted. Frequently appearing bases (at 50% or higher) at each position are shadowed. The sequence composed of the frequently appearing bases is shown below the alignment.
